# Supplementary material
Source: PubMed Central journal article supplement (PMC4521410)
Supplement: NIHMS710027-supplement-supplemental.pdf [file NIHMS710027-supplement-supplemental.pdf]

# Supporting Information for "Numerical Study on the Partitioning of the Molecular Polarizability into Fluctuating Charge and Induced Atomic Dipole Contributions"

Ye Mei,<sup>\*,†,‡,¶</sup> Andrew C. Simmonett,<sup>¶</sup> Frank C. Pickard IV,<sup>¶</sup> Robert A. DiStasio Jr.,<sup>§</sup> Bernard R. Brooks,<sup>¶</sup> and Yihan Shao<sup>\*,||</sup>

<sup>†</sup>*State Key Laboratory of Precision Spectroscopy, Department of Physics and Institute of Theoretical and Computational Science, East China Normal University, Shanghai 200062, China*

<sup>‡</sup>*NYU-ECNU Center for Computational Chemistry, NYU Shanghai, Shanghai 200062, China*

<sup>¶</sup>*Laboratory of Computational Biology, National Institutes of Health, National Heart, Lung and Blood Institute, 5635 Fishers Lane, T-900 Suite, Rockville, Maryland 20852, United States*

<sup>§</sup>*Department of Chemistry, Princeton University, Princeton, New Jersey 08544, United States*

<sup>||</sup>*Q-Chem Inc., 6601 Owens Drive, Suite 105, Pleasanton, California 94588, United States*

E-mail: ymei@phy.ecnu.edu.cn; yihan@q-chem.com

## Coordinates of the molecules studied

### acetic acid

|   |          |          |          |
|---|----------|----------|----------|
| C | -0.59072 | 1.79325  | 0.00000  |
| H | -0.23404 | 2.29765  | 0.87365  |
| H | -0.23404 | 2.29765  | -0.87365 |
| H | -1.66072 | 1.79326  | 0.00000  |
| C | -0.07740 | 0.34132  | 0.00000  |
| O | 0.74457  | -0.12385 | 1.07372  |
| H | 0.87981  | 0.58678  | 1.70484  |
| O | -0.37880 | -0.43718 | -0.94163 |

### adenine

|   |          |          |          |
|---|----------|----------|----------|
| N | 0.27930  | 2.40684  | -0.60575 |
| C | -1.08486 | 2.44575  | -0.55116 |
| H | -1.65944 | 3.02303  | -1.25609 |
| N | -1.59771 | 1.71799  | 0.42875  |
| C | -0.48973 | 1.17144  | 1.03019  |
| C | -0.34614 | 0.29147  | 2.11723  |
| N | -1.41871 | -0.16778 | 2.81014  |
| H | -1.23887 | -0.95948 | 3.40476  |
| H | -2.29187 | -0.17882 | 2.30736  |
| N | 0.88576  | -0.07008 | 2.49195  |
| C | 1.93523  | 0.40729  | 1.79680  |
| H | 2.90603  | 0.07884  | 2.14582  |
| N | 1.94098  | 1.22420  | 0.74022  |
| C | 0.69522  | 1.57799  | 0.40640  |
| H | 0.86101  | 2.82980  | -1.31045 |

ala dipeptide

|   |          |          |          |
|---|----------|----------|----------|
| N | -1.05923 | -0.35001 | 0.19637  |
| H | -0.80988 | -1.24854 | 0.59334  |
| C | 0.05469  | 0.54552  | -0.04213 |
| H | -0.04486 | 0.95423  | -1.05597 |
| C | 0.07581  | 1.72051  | 0.95605  |
| C | 1.33633  | -0.29795 | 0.05991  |
| H | 0.18655  | 1.35011  | 1.98045  |
| H | 0.90038  | 2.41109  | 0.74484  |
| H | -0.86587 | 2.26842  | 0.87285  |
| O | 1.33705  | -1.40269 | 0.59852  |
| C | -2.31973 | -0.06559 | -0.23442 |
| O | -2.60053 | 0.99066  | -0.79508 |
| C | -3.36138 | -1.14337 | 0.02785  |
| H | -2.96461 | -2.02041 | 0.54824  |
| H | -4.17320 | -0.71296 | 0.62228  |
| H | -3.79054 | -1.45925 | -0.92826 |
| N | 2.44963  | 0.28357  | -0.46109 |
| C | 3.76380  | -0.33479 | -0.41123 |
| H | 2.35526  | 1.18345  | -0.91033 |
| H | 3.65421  | -1.29475 | 0.09441  |
| H | 4.47255  | 0.28752  | 0.14740  |
| H | 4.15796  | -0.50362 | -1.41989 |

ammonia

|   |         |         |          |
|---|---------|---------|----------|
| N | 0.00000 | 0.00000 | -0.10000 |
|---|---------|---------|----------|

|   |          |          |         |
|---|----------|----------|---------|
| H | 0.94281  | 0.00000  | 0.23333 |
| H | -0.47141 | -0.81650 | 0.23333 |
| H | -0.47141 | 0.81650  | 0.23333 |

benzene

|   |          |          |          |
|---|----------|----------|----------|
| C | -1.01655 | -0.68558 | 0.00000  |
| C | 0.37861  | -0.68558 | 0.00000  |
| C | 1.07615  | 0.52217  | 0.00000  |
| C | 0.37850  | 1.73068  | -0.00120 |
| C | -1.01633 | 1.73060  | -0.00168 |
| C | -1.71393 | 0.52240  | -0.00068 |
| H | -1.56631 | -1.63790 | 0.00045  |
| H | 0.92812  | -1.63809 | 0.00131  |
| H | 2.17583  | 0.52225  | 0.00063  |
| H | 0.92870  | 2.68282  | -0.00126 |
| H | -1.56645 | 2.68288  | -0.00263 |
| H | -2.81353 | 0.52258  | -0.00086 |

dodecahexene

|   |          |         |         |
|---|----------|---------|---------|
| C | 0.08069  | 6.73930 | 0.00000 |
| H | -0.99732 | 6.84420 | 0.00000 |
| H | 0.66641  | 7.64727 | 0.00000 |
| C | 0.65478  | 5.53717 | 0.00000 |
| H | 1.73762  | 5.46023 | 0.00000 |
| C | -0.08069 | 4.28826 | 0.00000 |
| H | -1.16511 | 4.35574 | 0.00000 |
| C | 0.50069  | 3.07896 | 0.00000 |

|   |          |          |         |
|---|----------|----------|---------|
| H | 1.58560  | 3.01696  | 0.00000 |
| C | -0.22441 | 1.83277  | 0.00000 |
| H | -1.30923 | 1.89309  | 0.00000 |
| C | 0.36140  | 0.62294  | 0.00000 |
| H | 1.44634  | 0.56362  | 0.00000 |
| C | -0.36140 | -0.62294 | 0.00000 |
| H | -1.44634 | -0.56362 | 0.00000 |
| C | 0.22441  | -1.83277 | 0.00000 |
| H | 1.30923  | -1.89309 | 0.00000 |
| C | -0.50069 | -3.07896 | 0.00000 |
| H | -1.58560 | -3.01696 | 0.00000 |
| C | 0.08069  | -4.28826 | 0.00000 |
| H | 1.16511  | -4.35574 | 0.00000 |
| C | -0.65478 | -5.53717 | 0.00000 |
| H | -1.73762 | -5.46023 | 0.00000 |
| C | -0.08069 | -6.73930 | 0.00000 |
| H | 0.99732  | -6.84420 | 0.00000 |
| H | -0.66641 | -7.64727 | 0.00000 |

ethanol

|   |          |          |          |
|---|----------|----------|----------|
| C | 1.22255  | -0.22191 | 0.00005  |
| H | 1.28862  | -0.86063 | 0.88707  |
| H | 2.07582  | 0.46577  | -0.00005 |
| H | 1.28861  | -0.86083 | -0.88683 |
| C | -0.08700 | 0.54899  | -0.00004 |
| H | -0.13926 | 1.20115  | 0.88760  |
| H | -0.13915 | 1.20111  | -0.88774 |

|   |          |          |          |
|---|----------|----------|----------|
| O | -1.15023 | -0.39997 | -0.00010 |
| H | -1.98606 | 0.09077  | 0.00073  |

formamide

|   |          |          |         |
|---|----------|----------|---------|
| C | 0.00000  | 0.41961  | 0.00000 |
| H | -0.46875 | 1.43564  | 0.00000 |
| O | 1.20062  | 0.23936  | 0.00000 |
| N | -0.93877 | -0.56780 | 0.00000 |
| H | -0.63671 | -1.53633 | 0.00000 |
| H | -1.92811 | -0.35729 | 0.00000 |

formic acid

|   |          |          |         |
|---|----------|----------|---------|
| C | -1.88890 | -0.17969 | 0.00000 |
| O | -1.49328 | 1.07369  | 0.00000 |
| O | -1.17043 | -1.16659 | 0.00000 |
| H | -2.97949 | -0.25883 | 0.00000 |
| H | -0.49883 | 1.10719  | 0.00000 |

indole

|   |          |          |         |
|---|----------|----------|---------|
| C | -1.37635 | 1.12840  | 0.00000 |
| C | -2.13978 | -0.01192 | 0.00000 |
| C | 0.00000  | 0.71306  | 0.00000 |
| H | -3.21430 | -0.13222 | 0.00000 |
| N | -1.31754 | -1.12107 | 0.00000 |
| C | 0.00000  | -0.71306 | 0.00000 |
| C | 1.23486  | 1.38955  | 0.00000 |
| H | -1.63527 | -2.07920 | 0.00000 |

|   |          |          |         |
|---|----------|----------|---------|
| C | 1.18380  | -1.46147 | 0.00000 |
| C | 2.41170  | 0.65004  | 0.00000 |
| H | 1.26532  | 2.47657  | 0.00000 |
| H | 1.16255  | -2.54800 | 0.00000 |
| C | 2.38621  | -0.76221 | 0.00000 |
| H | 3.36972  | 1.16332  | 0.00000 |
| H | 3.32315  | -1.31275 | 0.00000 |
| H | -1.74984 | 2.14345  | 0.00000 |

methanal

|   |          |          |         |
|---|----------|----------|---------|
| C | 0.00001  | 0.52896  | 0.00000 |
| H | -0.93793 | 1.12359  | 0.00000 |
| H | 0.93785  | 1.12375  | 0.00000 |
| O | 0.00001  | -0.67764 | 0.00000 |

methane

|   |          |          |          |
|---|----------|----------|----------|
| C | 0.00000  | 0.00000  | 0.00000  |
| H | 0.63134  | 0.63134  | 0.63134  |
| H | -0.63134 | -0.63134 | 0.63134  |
| H | -0.63134 | 0.63134  | -0.63134 |
| H | 0.63134  | -0.63134 | -0.63134 |

methanol

|   |         |          |          |
|---|---------|----------|----------|
| C | 0.66233 | -0.01954 | 0.00000  |
| H | 1.07972 | 0.99103  | -0.00000 |
| H | 1.03696 | -0.54366 | -0.89315 |
| H | 1.03696 | -0.54366 | 0.89315  |

|   |          |          |         |
|---|----------|----------|---------|
| O | -0.74917 | 0.12250  | 0.00000 |
| H | -1.13424 | -0.76642 | 0.00000 |

methyl ether

|   |          |          |          |
|---|----------|----------|----------|
| C | 1.17104  | -0.19524 | 0.00000  |
| H | 2.02189  | 0.49141  | -0.00009 |
| H | 1.23255  | -0.83979 | -0.89289 |
| H | 1.23263  | -0.83967 | 0.89298  |
| O | 0.00000  | 0.58988  | 0.00000  |
| C | -1.17104 | -0.19524 | 0.00000  |
| H | -1.23259 | -0.83973 | 0.89293  |
| H | -2.02189 | 0.49141  | 0.00000  |
| H | -1.23259 | -0.83973 | -0.89294 |

mNA

|   |          |          |          |
|---|----------|----------|----------|
| C | -0.59193 | 0.12486  | -0.00306 |
| C | 0.40335  | -0.84636 | -0.00827 |
| C | 1.74816  | -0.44665 | -0.00826 |
| C | 2.03992  | 0.93127  | -0.00078 |
| C | 1.01858  | 1.87786  | 0.00499  |
| C | -0.32111 | 1.49091  | 0.00383  |
| H | 0.12422  | -1.89339 | -0.01639 |
| H | 3.07812  | 1.25483  | -0.00481 |
| H | 1.27157  | 2.93406  | 0.01209  |
| H | -1.13225 | 2.20666  | 0.00955  |
| N | -1.99725 | -0.32050 | 0.00106  |
| N | 2.76786  | -1.39127 | -0.07307 |



|   |          |          |         |
|---|----------|----------|---------|
| O | -2.87212 | 0.54490  | 0.00052 |
| O | -2.21670 | -1.53226 | 0.00573 |
| H | 2.52506  | -2.32099 | 0.24407 |
| H | 3.66777  | -1.09120 | 0.27878 |

neopentane

|   |          |          |          |
|---|----------|----------|----------|
| C | -0.00003 | 0.00007  | 0.00000  |
| C | 0.50985  | -1.44168 | 0.00000  |
| C | -1.52955 | -0.00025 | 0.00000  |
| C | 0.50985  | 0.72093  | 1.24862  |
| C | 0.50985  | 0.72093  | -1.24862 |
| H | 1.60098  | -1.46812 | 0.00000  |
| H | 0.15872  | -1.97817 | 0.88328  |
| H | 0.15872  | -1.97817 | -0.88328 |
| H | -1.91913 | 1.01932  | 0.00000  |
| H | -1.91877 | -0.51017 | -0.88318 |
| H | -1.91877 | -0.51017 | 0.88318  |
| H | 0.15752  | 0.22552  | 2.15514  |
| H | 1.60103  | 0.73249  | 1.27267  |
| H | 0.16067  | 1.75475  | 1.27126  |
| H | 0.15752  | 0.22552  | -2.15514 |
| H | 0.16067  | 1.75475  | -1.27126 |
| H | 1.60103  | 0.73249  | -1.27267 |

pNA

|   |         |         |          |
|---|---------|---------|----------|
| C | 1.36325 | 1.21464 | -0.00496 |
| C | 2.08197 | 0.00003 | -0.00555 |

|   |          |          |          |
|---|----------|----------|----------|
| C | 1.36322  | -1.21459 | -0.00489 |
| C | -0.02194 | -1.21561 | -0.00384 |
| C | -0.71044 | 0.00004  | -0.00267 |
| C | -0.02194 | 1.21567  | -0.00383 |
| H | 1.90469  | 2.15721  | -0.00950 |
| H | 1.90471  | -2.15713 | -0.00939 |
| H | -0.58336 | -2.14191 | -0.00129 |
| H | -0.58327 | 2.14202  | -0.00124 |
| N | 3.46137  | -0.00004 | -0.05562 |
| H | 3.93557  | 0.84596  | 0.22896  |
| H | 3.93548  | -0.84613 | 0.22887  |
| N | -2.16615 | -0.00001 | 0.00304  |
| O | -2.74416 | 1.09073  | 0.00541  |
| O | -2.74398 | -1.09083 | 0.00535  |

thymine

|   |          |          |          |
|---|----------|----------|----------|
| N | 1.27546  | -0.64790 | -1.97791 |
| C | 1.41305  | -1.55368 | -0.95507 |
| H | 2.42588  | -1.86708 | -0.74688 |
| C | 0.35760  | -2.02395 | -0.25306 |
| C | 0.48213  | -3.01795 | 0.85212  |
| H | 0.17577  | -2.57561 | 1.79863  |
| H | -0.16017 | -3.87704 | 0.66395  |
| H | 1.51124  | -3.35728 | 0.95137  |
| C | -0.96847 | -1.52981 | -0.59398 |
| O | -2.00293 | -1.83970 | -0.01995 |
| N | -0.99569 | -0.63839 | -1.67204 |

|   |          |          |          |
|---|----------|----------|----------|
| H | -1.90141 | -0.25017 | -1.89858 |
| C | 0.06847  | -0.11918 | -2.37638 |
| O | -0.03979 | 0.72270  | -3.25311 |
| H | 2.08533  | -0.27602 | -2.44546 |

uracil

|   |         |          |          |
|---|---------|----------|----------|
| N | 2.01136 | -1.21321 | -0.09807 |
| C | 2.02571 | -0.69718 | -1.36440 |
| H | 2.29752 | -1.39106 | -2.14565 |
| C | 1.71452 | 0.59197  | -1.61249 |
| H | 1.72729 | 0.99085  | -2.61200 |
| C | 1.30896 | 1.45753  | -0.52059 |
| O | 0.92059 | 2.61109  | -0.62605 |
| N | 1.37689 | 0.83975  | 0.73464  |
| H | 1.05180 | 1.38622  | 1.52337  |
| C | 1.64599 | -0.48521 | 1.01873  |
| O | 1.56111 | -0.97181 | 2.12981  |
| H | 2.12946 | -2.20150 | 0.05681  |

val dipeptide

|   |          |          |          |
|---|----------|----------|----------|
| N | -1.22317 | -0.51401 | 0.24775  |
| H | -1.09878 | -0.99629 | 1.12993  |
| C | -0.04006 | 0.12243  | -0.31759 |
| H | -0.12777 | 0.07015  | -1.40640 |
| C | 0.06411  | 1.62900  | 0.07691  |
| C | 1.16724  | -0.69918 | 0.14273  |
| H | -0.91523 | 2.04452  | -0.19314 |

|   |          |          |          |
|---|----------|----------|----------|
| C | 0.28075  | 1.84882  | 1.57899  |
| C | 1.12716  | 2.35945  | -0.75272 |
| O | 1.19257  | -1.22265 | 1.27156  |
| H | 1.26933  | 1.49931  | 1.89925  |
| H | 0.21511  | 2.91742  | 1.81335  |
| H | -0.47242 | 1.32958  | 2.18199  |
| H | 0.97208  | 2.20813  | -1.82785 |
| H | 1.08363  | 3.43694  | -0.55701 |
| H | 2.13961  | 2.02094  | -0.50374 |
| C | -2.44503 | -0.45009 | -0.32331 |
| O | -2.65278 | 0.15431  | -1.39127 |
| C | -3.55635 | -1.17596 | 0.40209  |
| H | -3.22607 | -1.65336 | 1.32814  |
| H | -4.35755 | -0.46504 | 0.62914  |
| H | -3.97282 | -1.93840 | -0.26504 |
| N | 2.18225  | -0.82006 | -0.72894 |
| C | 3.42119  | -1.50186 | -0.37474 |
| H | 2.11962  | -0.34997 | -1.62302 |
| H | 3.91655  | -1.00982 | 0.46879  |
| H | 4.08565  | -1.48142 | -1.23917 |
| H | 3.22309  | -2.54313 | -0.10336 |

water

|   |          |          |         |
|---|----------|----------|---------|
| O | -1.55101 | -0.11452 | 0.00000 |
| H | -1.93426 | 0.76250  | 0.00000 |
| H | -0.59968 | 0.04071  | 0.00000 |

water dimer

|   |           |           |           |
|---|-----------|-----------|-----------|
| O | -1.551007 | -0.114520 | 0.000000  |
| H | -1.934259 | 0.762503  | 0.000000  |
| H | -0.599677 | 0.040712  | 0.000000  |
| O | 1.350625  | 0.111469  | 0.000000  |
| H | 1.680398  | -0.373741 | -0.758561 |
| H | 1.680398  | -0.373741 | 0.758561  |

phenol dimer

|   |            |            |            |
|---|------------|------------|------------|
| C | -2.0071056 | 0.7638459  | -0.1083509 |
| O | -1.3885044 | 1.9298523  | -0.4431206 |
| H | -0.5238121 | 1.9646519  | -0.0064609 |
| C | -1.4630807 | -0.1519120 | 0.7949930  |
| C | -2.1475789 | -1.3295094 | 1.0883677  |
| C | -3.3743208 | -1.6031427 | 0.4895864  |
| C | -3.9143727 | -0.6838545 | -0.4091028 |
| C | -3.2370496 | 0.4929609  | -0.7096126 |
| H | -0.5106510 | 0.0566569  | 1.2642563  |
| H | -1.7151135 | -2.0321452 | 1.7878417  |
| H | -3.9024664 | -2.5173865 | 0.7197947  |
| H | -4.8670730 | -0.8822939 | -0.8811319 |
| H | -3.6431662 | 1.2134345  | -1.4057590 |
| O | 1.3531168  | 1.9382724  | 0.4723133  |
| C | 2.0369747  | 0.7865043  | 0.1495491  |
| H | 1.7842846  | 2.3487495  | 1.2297110  |
| C | 1.5904026  | 0.0696860  | -0.9574153 |
| C | 2.2417367  | -1.1069765 | -1.3128110 |

|   |           |            |            |
|---|-----------|------------|------------|
| C | 3.3315674 | -1.5665603 | -0.5748636 |
| C | 3.7696838 | -0.8396901 | 0.5286439  |
| C | 3.1224836 | 0.3383498  | 0.8960491  |
| H | 0.7445512 | 0.4367983  | -1.5218583 |
| H | 1.8921463 | -1.6649726 | -2.1701843 |
| H | 3.8330227 | -2.4811537 | -0.8566666 |
| H | 4.6137632 | -1.1850101 | 1.1092635  |
| H | 3.4598854 | 0.9030376  | 1.7569489  |

2-pyridoxine/2-aminopyridine

|   |            |            |            |
|---|------------|------------|------------|
| O | -1.3976213 | -1.8858368 | -0.3673061 |
| N | -1.4642550 | 0.3641828  | 0.0192301  |
| C | -4.1857398 | 0.3696669  | 0.0360960  |
| C | -3.4832598 | 1.5783111  | 0.2500752  |
| C | -2.1179502 | 1.5307048  | 0.2338383  |
| C | -2.0773833 | -0.8637492 | -0.1899414 |
| C | -3.5156032 | -0.8051950 | -0.1757585 |
| H | -5.2678045 | 0.3707428  | 0.0411419  |
| H | -3.9920334 | 2.5127560  | 0.4214414  |
| H | -1.4929196 | 2.3984096  | 0.3885018  |
| H | -4.0401226 | -1.7348452 | -0.3379269 |
| H | -0.4265266 | 0.3612127  | 0.0073538  |
| N | 1.4327616  | 0.3639703  | -0.0159508 |
| C | 2.1154200  | -0.7803450 | 0.1681099  |
| C | 3.5237586  | -0.8016096 | 0.1545027  |
| C | 4.2185897  | 0.3735783  | -0.0525929 |
| C | 3.5099708  | 1.5615014  | -0.2449763 |

|   |           |            |            |
|---|-----------|------------|------------|
| C | 2.1280138 | 1.4953324  | -0.2175374 |
| H | 4.0459206 | -1.7361356 | 0.3076883  |
| H | 5.2999426 | 0.3666009  | -0.0663349 |
| H | 4.0110923 | 2.5024313  | -0.4130052 |
| H | 1.5339878 | 2.3893837  | -0.3670565 |
| N | 1.3883123 | -1.9083038 | 0.4198149  |
| H | 1.8694714 | -2.7812773 | 0.2940385  |
| H | 0.4089067 | -1.9079942 | 0.1300860  |

hydrogen-bonded adenine/thymine complex

|   |            |            |            |
|---|------------|------------|------------|
| N | 0.9350155  | -0.0279801 | -0.3788916 |
| C | 1.6739638  | -0.0357766 | 0.7424316  |
| C | 3.0747955  | -0.0094480 | 0.5994562  |
| C | 3.5646109  | 0.0195446  | -0.7059872 |
| N | 2.8531510  | 0.0258031  | -1.8409596 |
| C | 1.5490760  | 0.0012569  | -1.5808009 |
| N | 4.0885824  | -0.0054429 | 1.5289786  |
| C | 5.1829921  | 0.0253971  | 0.7872176  |
| N | 4.9294871  | 0.0412404  | -0.5567274 |
| N | 1.0716177  | -0.0765366 | 1.9391390  |
| H | 0.8794435  | 0.0050260  | -2.4315709 |
| H | 6.1882591  | 0.0375542  | 1.1738824  |
| H | 5.6035368  | 0.0648755  | -1.3036811 |
| H | 0.0586915  | -0.0423765 | 2.0039181  |
| H | 1.6443796  | -0.0347395 | 2.7619159  |
| N | -3.9211729 | -0.0009646 | -1.5163659 |
| C | -4.6136833 | 0.0169051  | -0.3336520 |

|   |            |            |            |
|---|------------|------------|------------|
| C | -3.9917387 | 0.0219348  | 0.8663338  |
| C | -2.5361367 | 0.0074651  | 0.8766724  |
| N | -1.9256484 | -0.0110593 | -0.3638948 |
| C | -2.5395897 | -0.0149474 | -1.5962357 |
| C | -4.7106131 | 0.0413373  | 2.1738637  |
| O | -1.8674730 | 0.0112093  | 1.9120833  |
| O | -1.9416783 | -0.0291878 | -2.6573783 |
| H | -4.4017172 | -0.0036078 | -2.4004924 |
| H | -0.8838255 | -0.0216168 | -0.3784269 |
| H | -5.6909220 | 0.0269347  | -0.4227183 |
| H | -4.4439282 | -0.8302573 | 2.7695655  |
| H | -4.4267056 | 0.9186178  | 2.7530256  |
| H | -5.7883971 | 0.0505530  | 2.0247280  |

adenine/thymine complex in stacking

|   |            |            |            |
|---|------------|------------|------------|
| N | 0.2793014  | 2.4068393  | -0.6057517 |
| C | -1.0848570 | 2.4457461  | -0.5511608 |
| H | -1.6594403 | 3.0230294  | -1.2560905 |
| N | -1.5977117 | 1.7179877  | 0.4287543  |
| C | -0.4897255 | 1.1714358  | 1.0301910  |
| C | -0.3461366 | 0.2914710  | 2.1172343  |
| N | -1.4187090 | -0.1677767 | 2.8101441  |
| H | -1.2388750 | -0.9594802 | 3.4047578  |
| H | -2.2918734 | -0.1788223 | 2.3073619  |
| N | 0.8857630  | -0.0700763 | 2.4919494  |
| C | 1.9352348  | 0.4072878  | 1.7968022  |
| H | 2.9060330  | 0.0788414  | 2.1458181  |



|   |            |            |            |
|---|------------|------------|------------|
| N | 1.9409775  | 1.2242019  | 0.7402202  |
| C | 0.6952186  | 1.5779858  | 0.4063984  |
| H | 0.8610073  | 2.8298045  | -1.3104502 |
| N | 1.2754606  | -0.6478993 | -1.9779104 |
| C | 1.4130533  | -1.5536850 | -0.9550667 |
| H | 2.4258769  | -1.8670780 | -0.7468778 |
| C | 0.3575976  | -2.0239499 | -0.2530575 |
| C | 0.4821292  | -3.0179494 | 0.8521221  |
| H | 0.1757705  | -2.5756065 | 1.7986281  |
| H | -0.1601691 | -3.8770412 | 0.6639498  |
| H | 1.5112443  | -3.3572767 | 0.9513659  |
| C | -0.9684711 | -1.5298112 | -0.5939792 |
| O | -2.0029280 | -1.8396957 | -0.0199453 |
| N | -0.9956916 | -0.6383870 | -1.6720420 |
| H | -1.9014057 | -0.2501720 | -1.8985760 |
| C | 0.0684702  | -0.1191762 | -2.3763759 |
| O | -0.0397875 | 0.7227006  | -3.2531083 |
| H | 2.0853289  | -0.2760176 | -2.4454577 |

benzene/ammonia complex

|   |            |           |            |
|---|------------|-----------|------------|
| C | -0.7392810 | 0.5158785 | -1.2071079 |
| C | -1.4261442 | 0.3965455 | 0.0000000  |
| C | -0.7392810 | 0.5158785 | 1.2071079  |
| C | 0.6342269  | 0.7546398 | 1.2070735  |
| C | 1.3210434  | 0.8737566 | 0.0000000  |
| C | 0.6342269  | 0.7546398 | -1.2070735 |
| H | -1.2719495 | 0.4206316 | -2.1432894 |

|   |            |            |            |
|---|------------|------------|------------|
| H | -2.4902205 | 0.2052381  | 0.0000000  |
| H | -1.2719495 | 0.4206316  | 2.1432894  |
| H | 1.1668005  | 0.8474885  | 2.1436950  |
| H | 2.3863585  | 1.0596312  | 0.0000000  |
| H | 1.1668005  | 0.8474885  | -2.1436950 |
| N | 0.1803930  | -2.9491231 | 0.0000000  |
| H | 0.7595495  | -3.1459477 | -0.8060729 |
| H | 0.7595495  | -3.1459477 | 0.8060729  |
| H | 0.0444167  | -1.9449399 | 0.0000000  |

T-shaped benzene dimer

|   |            |            |            |
|---|------------|------------|------------|
| C | 0.0000000  | 0.0000000  | 1.0590353  |
| C | 0.0000000  | -1.2060084 | 1.7576742  |
| C | 0.0000000  | -1.2071767 | 3.1515905  |
| C | 0.0000000  | 0.0000000  | 3.8485751  |
| C | 0.0000000  | 1.2071767  | 3.1515905  |
| C | 0.0000000  | 1.2060084  | 1.7576742  |
| H | 0.0000000  | 0.0000000  | -0.0215805 |
| H | 0.0000000  | -2.1416387 | 1.2144217  |
| H | 0.0000000  | -2.1435657 | 3.6929953  |
| H | 0.0000000  | 0.0000000  | 4.9301499  |
| H | 0.0000000  | 2.1435657  | 3.6929953  |
| H | 0.0000000  | 2.1416387  | 1.2144217  |
| C | -1.3940633 | 0.0000000  | -2.4541524 |
| C | -0.6970468 | 1.2072378  | -2.4546277 |
| C | 0.6970468  | 1.2072378  | -2.4546277 |
| C | 1.3940633  | 0.0000000  | -2.4541524 |

|   |            |            |            |
|---|------------|------------|------------|
| C | 0.6970468  | -1.2072378 | -2.4546277 |
| C | -0.6970468 | -1.2072378 | -2.4546277 |
| H | -2.4753995 | 0.0000000  | -2.4503221 |
| H | -1.2382321 | 2.1435655  | -2.4536764 |
| H | 1.2382321  | 2.1435655  | -2.4536764 |
| H | 2.4753995  | 0.0000000  | -2.4503221 |
| H | 1.2382321  | -2.1435655 | -2.4536764 |
| H | -1.2382321 | -2.1435655 | -2.4536764 |

benzene/HCN complex

|   |            |            |            |
|---|------------|------------|------------|
| C | -0.7097741 | -0.9904230 | 1.2077018  |
| C | -1.4065340 | -0.9653529 | 0.0000000  |
| C | -0.7097741 | -0.9904230 | -1.2077018 |
| C | 0.6839651  | -1.0405105 | -1.2078652 |
| C | 1.3809779  | -1.0655522 | 0.0000000  |
| C | 0.6839651  | -1.0405105 | 1.2078652  |
| H | -1.2499482 | -0.9686280 | 2.1440507  |
| H | -2.4869197 | -0.9237060 | 0.0000000  |
| H | -1.2499482 | -0.9686280 | -2.1440507 |
| H | 1.2242882  | -1.0580753 | -2.1442563 |
| H | 2.4615886  | -1.1029818 | 0.0000000  |
| H | 1.2242882  | -1.0580753 | 2.1442563  |
| N | -0.0034118 | 3.5353926  | 0.0000000  |
| C | 0.0751963  | 2.3707040  | 0.0000000  |
| H | 0.1476295  | 1.3052847  | 0.0000000  |

benzene/methane complex

|   |            |            |            |
|---|------------|------------|------------|
| C | 1.3932178  | 0.0362913  | -0.6332803 |
| C | 0.7280364  | -1.1884015 | -0.6333017 |
| C | -0.6651797 | -1.2247077 | -0.6332803 |
| C | -1.3932041 | -0.0362972 | -0.6333017 |
| C | -0.7280381 | 1.1884163  | -0.6332803 |
| C | 0.6651677  | 1.2246987  | -0.6333017 |
| H | 2.4742737  | 0.0644484  | -0.6317240 |
| H | 1.2929588  | -2.1105409 | -0.6317401 |
| H | -1.1813229 | -2.1750081 | -0.6317240 |
| H | -2.4742614 | -0.0644647 | -0.6317401 |
| H | -1.2929508 | 2.1105596  | -0.6317240 |
| H | 1.1813026  | 2.1750056  | -0.6317401 |
| C | 0.0000000  | 0.0000000  | 3.0826195  |
| H | 0.5868776  | 0.8381742  | 3.4463772  |
| H | -1.0193189 | 0.0891638  | 3.4463772  |
| H | 0.0000000  | 0.0000000  | 1.9966697  |
| H | 0.4324413  | -0.9273380 | 3.4463772  |

benzene/water complex

|   |           |            |            |
|---|-----------|------------|------------|
| C | 0.7806117 | -0.6098875 | -1.2075426 |
| C | 0.4784039 | 0.7510406  | -1.2079040 |
| C | 0.3276592 | 1.4318573  | 0.0000000  |
| C | 0.4784039 | 0.7510406  | 1.2079040  |
| C | 0.7806117 | -0.6098875 | 1.2075426  |
| C | 0.9321510 | -1.2899614 | 0.0000000  |
| H | 0.8966688 | -1.1376051 | -2.1441482 |
| H | 0.3573895 | 1.2782091  | -2.1440546 |

|   |            |            |           |
|---|------------|------------|-----------|
| H | 0.0918593  | 2.4871407  | 0.0000000 |
| H | 0.3573895  | 1.2782091  | 2.1440546 |
| H | 0.8966688  | -1.1376051 | 2.1441482 |
| H | 1.1690064  | -2.3451668 | 0.0000000 |
| O | -2.7885270 | -0.2744854 | 0.0000000 |
| H | -2.6229114 | -1.2190831 | 0.0000000 |
| H | -1.9015103 | 0.0979110  | 0.0000000 |

benzene/indole complex in stacking

|   |            |            |            |
|---|------------|------------|------------|
| C | -0.0210742 | 1.5318615  | -1.3639345 |
| C | -1.2746794 | 0.9741030  | -1.6074097 |
| C | -1.3783055 | -0.2256981 | -2.3084154 |
| C | -0.2289426 | -0.8664053 | -2.7687944 |
| C | 1.0247882  | -0.3035171 | -2.5312410 |
| C | 1.1289996  | 0.8966787  | -1.8299830 |
| H | 0.0600740  | 2.4565627  | -0.8093957 |
| H | -2.1651002 | 1.4654521  | -1.2405676 |
| H | -2.3509735 | -0.6616122 | -2.4926698 |
| H | -0.3103419 | -1.7955762 | -3.3172704 |
| H | 1.9165847  | -0.7940845 | -2.8993942 |
| H | 2.1000347  | 1.3326757  | -1.6400420 |
| H | -2.9417647 | 0.8953834  | 2.2239054  |
| C | -2.0220674 | 0.4258540  | 1.9013549  |
| C | -0.8149418 | 1.0740453  | 2.1066982  |
| H | -0.7851529 | 2.0443812  | 2.5856086  |
| C | 0.3704286  | 0.4492852  | 1.6847458  |
| C | 1.7508619  | 0.8038935  | 1.7194004  |

|   |            |            |           |
|---|------------|------------|-----------|
| H | 2.1870108  | 1.6998281  | 2.1275903 |
| C | 2.4451359  | -0.2310742 | 1.1353313 |
| N | 1.5646462  | -1.2137812 | 0.7555384 |
| C | 0.2861214  | -0.8269486 | 1.0618752 |
| C | -0.9284667 | -1.4853121 | 0.8606937 |
| H | -0.9729200 | -2.4554847 | 0.3834013 |
| C | -2.0792848 | -0.8417668 | 1.2876443 |
| H | -3.0389974 | -1.3203846 | 1.1468400 |
| H | 1.8075741  | -2.0366963 | 0.2333038 |
| H | 3.5028794  | -0.3485344 | 0.9695233 |

T-shaped benzene/indole complex

|   |            |            |            |
|---|------------|------------|------------|
| C | 2.5118997  | 1.6250148  | 0.0000000  |
| C | 2.7130094  | 0.9578537  | -1.2082918 |
| C | 3.1177821  | -0.3767436 | -1.2083647 |
| C | 3.3213848  | -1.0437307 | 0.0000000  |
| C | 3.1177821  | -0.3767436 | 1.2083647  |
| C | 2.7130094  | 0.9578537  | 1.2082918  |
| H | 2.2024038  | 2.6611358  | 0.0000000  |
| H | 2.5511760  | 1.4736908  | -2.1445900 |
| H | 3.2702999  | -0.8951406 | -2.1448379 |
| H | 3.6368139  | -2.0781521 | 0.0000000  |
| H | 3.2702999  | -0.8951406 | 2.1448379  |
| H | 2.5511760  | 1.4736908  | 2.1445900  |
| H | 0.8065245  | -0.4358866 | 0.0000000  |
| N | -0.1442408 | -0.7686927 | 0.0000000  |
| C | -0.5161122 | -2.0893220 | 0.0000000  |

|   |            |            |           |
|---|------------|------------|-----------|
| C | -1.8898755 | -2.1814495 | 0.0000000 |
| C | -2.3932317 | -0.8470830 | 0.0000000 |
| C | -1.2640653 | 0.0195887  | 0.0000000 |
| C | -1.3896004 | 1.4117668  | 0.0000000 |
| C | -2.6726501 | 1.9366450  | 0.0000000 |
| C | -3.8054511 | 1.0974790  | 0.0000000 |
| C | -3.6798167 | -0.2817209 | 0.0000000 |
| H | 0.2310024  | -2.8653173 | 0.0000000 |
| H | -2.4585759 | -3.0956052 | 0.0000000 |
| H | -0.5188733 | 2.0539520  | 0.0000000 |
| H | -2.8077570 | 3.0097859  | 0.0000000 |
| H | -4.7905991 | 1.5439372  | 0.0000000 |
| H | -4.5580187 | -0.9142916 | 0.0000000 |

water pentamer

|   |         |         |         |
|---|---------|---------|---------|
| O | 0.0000  | 0.0000  | 0.0000  |
| H | 0.0090  | 1.0000  | -0.0040 |
| H | -0.4750 | -0.3250 | 0.8170  |
| O | -1.3140 | -0.9010 | 2.2630  |
| H | -2.2540 | -0.5590 | 2.2610  |
| H | -0.8400 | -0.5690 | 3.0780  |
| O | 0.0260  | 2.7680  | -0.0110 |
| H | -0.4430 | 3.1020  | -0.8290 |
| H | 0.9710  | 3.0920  | -0.0120 |
| O | -1.3140 | -0.9190 | -2.2560 |
| H | -2.2540 | -0.5770 | -2.2580 |
| H | -0.8400 | -0.5870 | -1.4410 |

|   |        |         |        |
|---|--------|---------|--------|
| O | 2.6000 | -0.9470 | 0.0040 |
| H | 1.6600 | -0.6050 | 0.0020 |
| H | 3.0740 | -0.6150 | 0.8180 |



Correlation among all the charge definitions calculated  
at B3LYP/6-31G(d) level

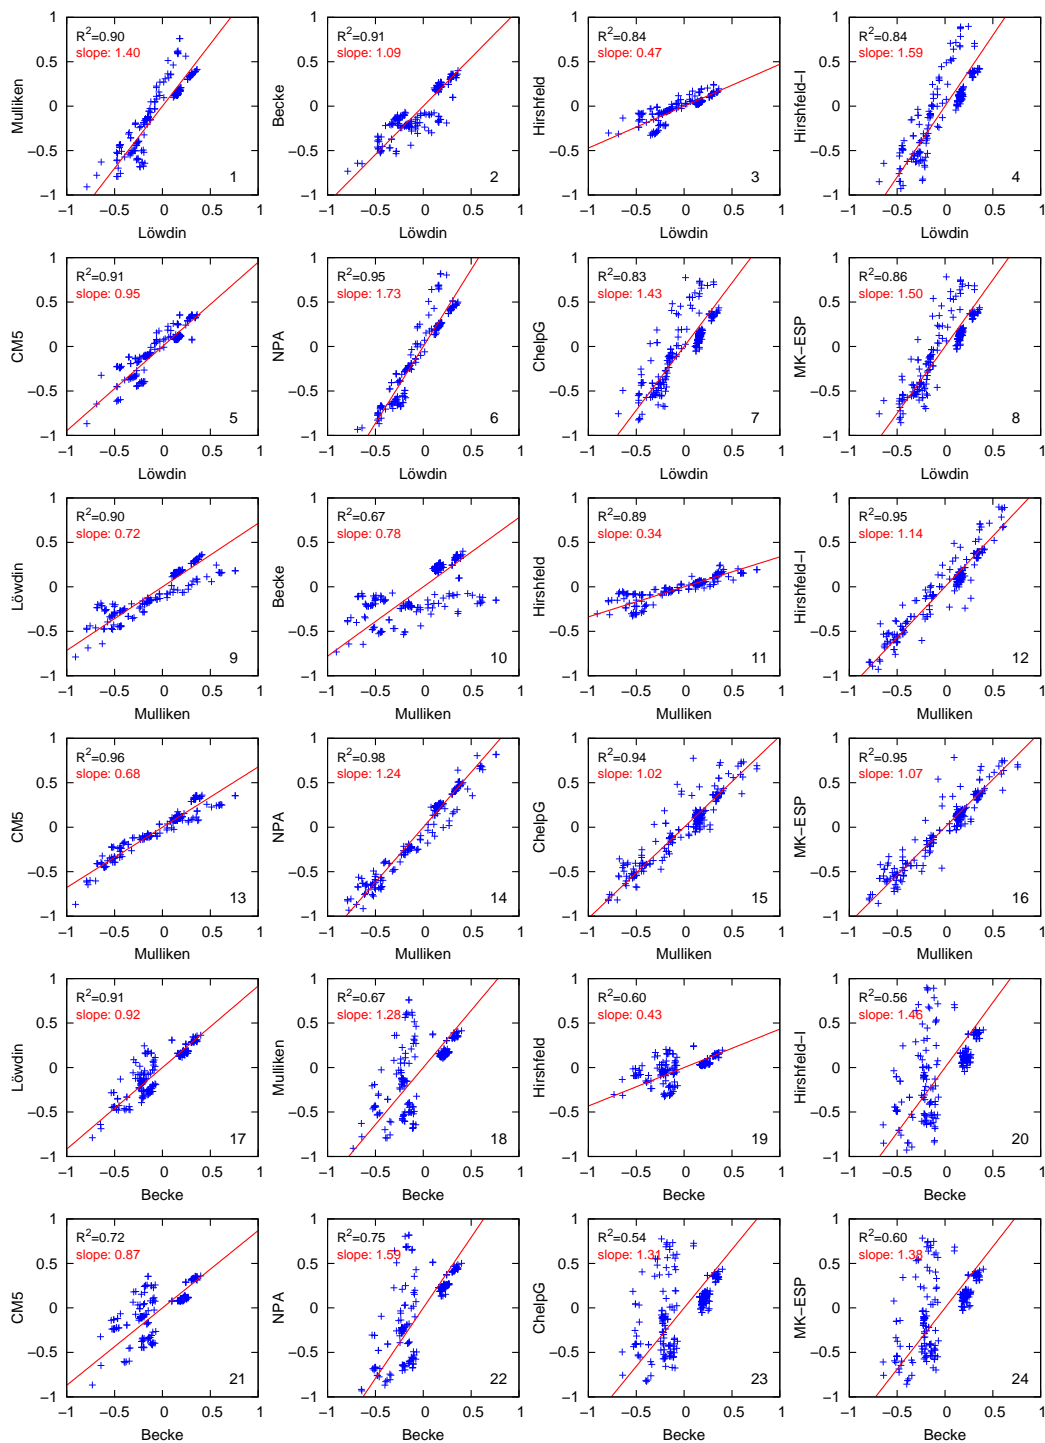

Figure 1

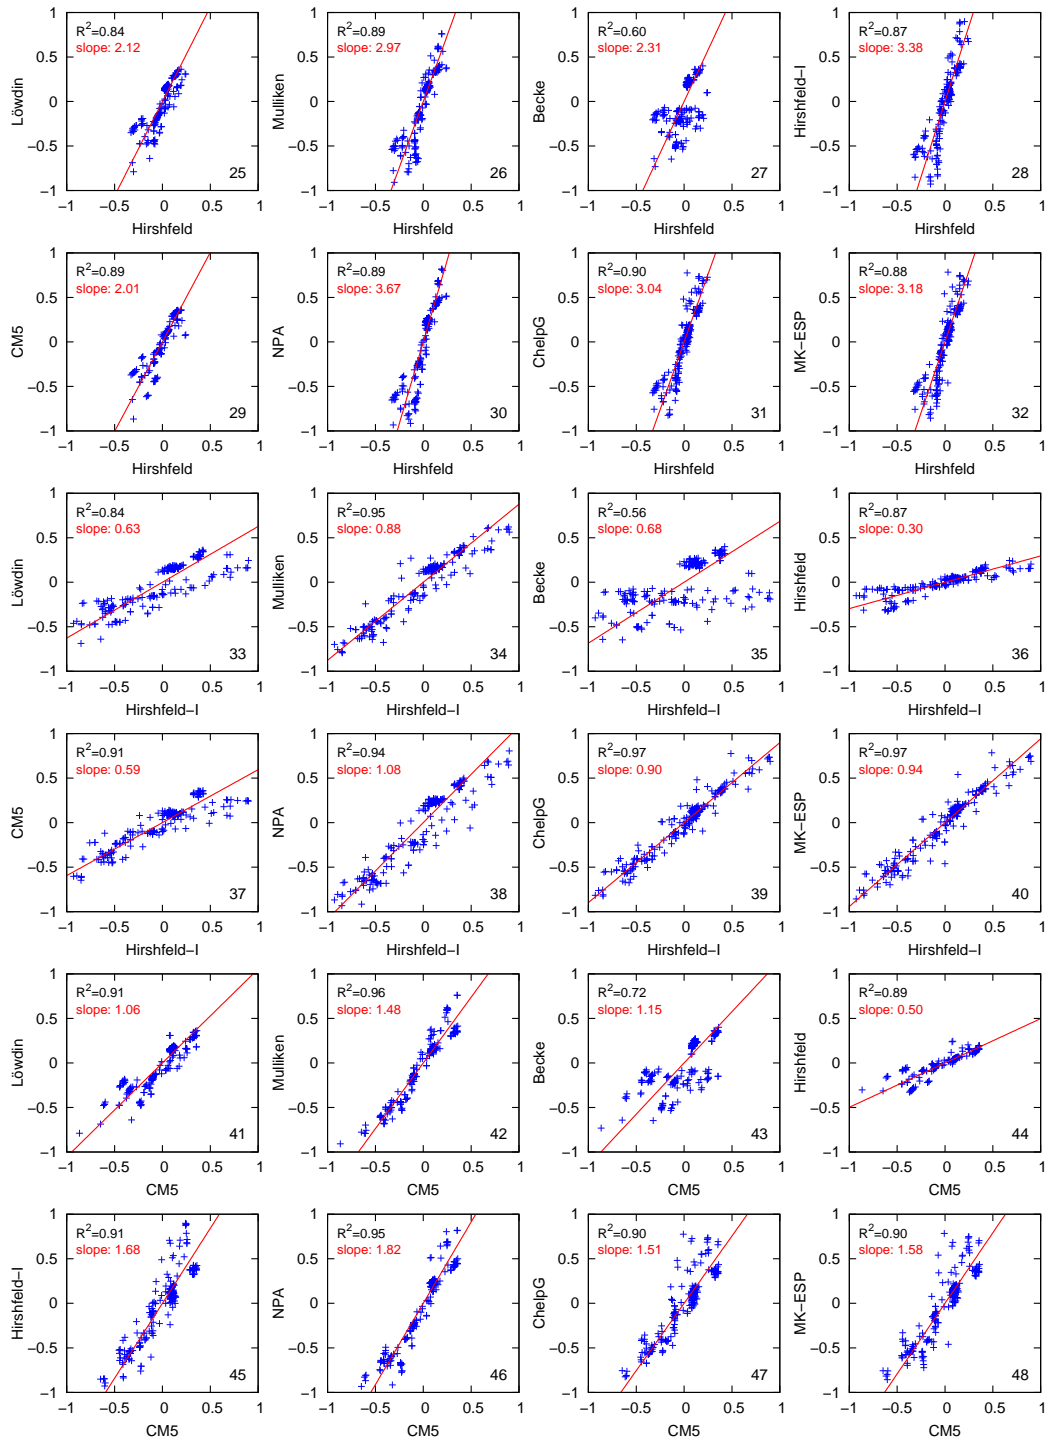

Figure 1: Continued

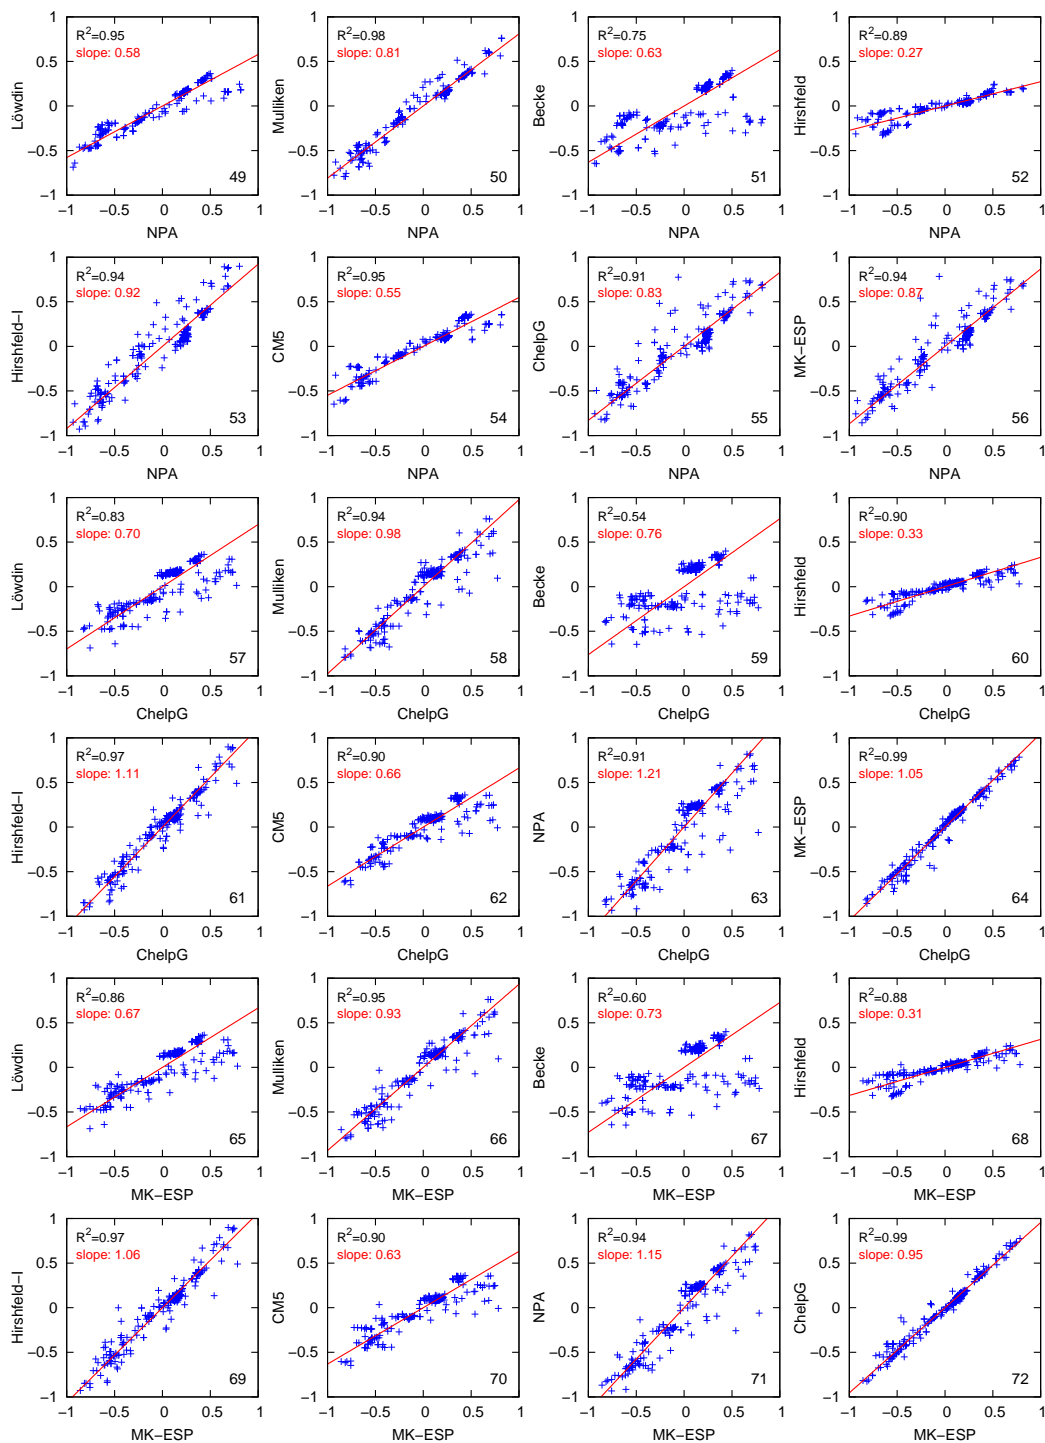

Figure 1: Continued

## atomic polarizabilities under Hirshfeld-I scheme

acetic acid

atom C

| v1         | v2         | v3         |
|------------|------------|------------|
| -1.0981283 | 0.4397581  | 0.2480772  |
| 0.2604062  | -2.0007748 | -0.0883950 |
| 0.1488067  | 0.1967390  | -0.7432086 |

atom H

| v1         | v2         | v3         |
|------------|------------|------------|
| -0.4473683 | 0.0190309  | -0.0267187 |
| -0.0250438 | -0.5955736 | -0.1389998 |
| -0.0517041 | -0.0676648 | -0.5484241 |

atom H

| v1         | v2         | v3         |
|------------|------------|------------|
| -0.4757272 | 0.0413473  | 0.0488627  |
| 0.0352478  | -0.4340527 | 0.0647952  |
| 0.0435920  | 0.0084614  | -0.4939985 |

atom H

| v1         | v2         | v3         |
|------------|------------|------------|
| -0.5208675 | -0.0492253 | -0.0225022 |
| -0.0013110 | -0.4733387 | 0.0521591  |
| 0.0059445  | 0.0408179  | -0.4102837 |

atom C

| v1         | v2         | v3         |
|------------|------------|------------|
| -1.4440093 | -0.6174179 | 1.2064980  |
| -0.5733857 | 0.3313005  | 0.6418860  |
| 1.2439889  | 0.5731833  | -0.0676071 |

atom O

| v1         | v2         | v3         |
|------------|------------|------------|
| -2.1329143 | -0.2435839 | 0.0628035  |
| 0.2662727  | -0.8721674 | 1.2549639  |
| 0.3584075  | 0.4025172  | -1.4312196 |

atom H

| v1         | v2         | v3         |
|------------|------------|------------|
| -0.2451283 | 0.0079157  | -0.0005705 |
| -0.0501856 | -0.0564050 | 0.0280412  |
| -0.0353579 | 0.1196117  | -0.2260767 |

atom O

| v1         | v2         | v3         |
|------------|------------|------------|
| -2.3629372 | 0.0809285  | 0.3715817  |
| -0.0729440 | -1.6562036 | 0.3923361  |
| 0.2883497  | 0.6570099  | -1.7317090 |

adenine

atom N

| v1         | v2         | v3         |
|------------|------------|------------|
| -0.5282288 | 0.0552556  | -0.3521580 |
| 0.1990152  | -1.8760879 | -1.0560684 |
| -0.6123398 | -1.1900926 | -0.9292477 |

atom C

| v1         | v2         | v3         |
|------------|------------|------------|
| -0.1799019 | -0.1584020 | 0.0623110  |
| -0.2150092 | -1.7072758 | -1.7224391 |
| 0.0535436  | -1.7512806 | -0.7867852 |

atom H

| v1         | v2         | v3         |
|------------|------------|------------|
| -0.5926845 | 0.1008926  | -0.1259750 |
| 0.0267506  | -0.6777004 | 0.1104958  |
| -0.0336592 | 0.0986856  | -0.7232681 |

atom N

| v1         | v2         | v3         |
|------------|------------|------------|
| -1.8006195 | 0.2818652  | -0.3830178 |
| 0.1633401  | -2.2856720 | -0.9728153 |
| -0.2988962 | -0.9606830 | -1.7010827 |

atom C

| v1         | v2         | v3         |
|------------|------------|------------|
| -0.0215314 | -0.3649564 | 0.0931245  |
| -0.4997426 | -2.1094124 | -1.2835855 |
| 0.4159896  | -1.3971573 | -1.5767819 |

atom C

| v1         | v2         | v3         |
|------------|------------|------------|
| 0.6159546  | -0.1484788 | -0.1990884 |
| 0.1720821  | -1.1618972 | -1.2985171 |
| -0.2698899 | -1.1214093 | -0.5524282 |

atom N

| v1         | v2         | v3         |
|------------|------------|------------|
| -1.2550040 | -0.4242796 | 1.0664342  |
| 0.4521228  | -1.0154490 | -1.6202020 |
| 1.6127305  | -0.3464852 | -2.2224144 |

atom H

| v1 | v2 | v3 |
|----|----|----|
|----|----|----|

|            |            |            |
|------------|------------|------------|
| -0.2241375 | -0.0067872 | 0.0311660  |
| -0.0624329 | -0.2527946 | 0.0751543  |
| 0.0504834  | -0.0531544 | -0.2834362 |

atom H

| v1         | v2         | v3         |
|------------|------------|------------|
| -0.2506539 | 0.0139513  | 0.1089560  |
| -0.0737009 | -0.2467215 | -0.0127159 |
| 0.0288479  | -0.0251582 | -0.2005664 |

atom N

| v1         | v2         | v3         |
|------------|------------|------------|
| -1.3992554 | 0.0376533  | -0.1294183 |
| 0.0321549  | -2.8101610 | -0.5681892 |
| -0.2341932 | -0.4833079 | -2.4121083 |

atom C

| v1         | v2         | v3         |
|------------|------------|------------|
| 0.4792664  | -0.1441348 | -0.0587023 |
| -0.1760522 | -1.6066877 | -1.5190336 |
| -0.0410382 | -1.5153938 | -0.7881038 |

atom H

| v1         | v2         | v3         |
|------------|------------|------------|
| -0.8273595 | 0.1287055  | -0.1531101 |
| 0.0915286  | -0.6270655 | -0.0131855 |
| -0.0978679 | -0.0102846 | -0.6027647 |

atom N

| v1         | v2         | v3         |
|------------|------------|------------|
| -1.9146946 | -0.1414992 | 0.0797773  |
| -0.0704892 | -2.4548009 | -0.9051994 |



-0.0132962 -0.8779438 -2.0178444

atom C

| v1         | v2         | v3         |
|------------|------------|------------|
| 0.4640993  | -0.2168652 | -0.0425965 |
| -0.4040859 | -1.4409043 | -1.0719775 |
| 0.2583050  | -1.1389810 | -0.9477678 |

atom H

| v1         | v2         | v3         |
|------------|------------|------------|
| -0.2300059 | -0.0244916 | 0.0135459  |
| 0.0129370  | -0.2631772 | -0.0081264 |
| -0.0167097 | 0.0143539  | -0.2538461 |

ala dipeptide

atom N

| v1         | v2         | v3         |
|------------|------------|------------|
| -1.1531950 | 0.0220898  | 0.3371764  |
| -0.0019581 | -0.5150832 | -0.7865190 |
| 0.1589676  | -0.7189022 | -2.0189099 |

atom H

| v1         | v2         | v3         |
|------------|------------|------------|
| 0.0006852  | -0.0773141 | 0.0330352  |
| -0.1357477 | -0.2176533 | -0.0144256 |
| 0.0506399  | -0.0304932 | -0.2896917 |

atom C

| v1         | v2         | v3         |
|------------|------------|------------|
| -0.6042111 | 0.1069474  | -0.0039184 |
| 0.0570377  | -0.6075051 | -0.3320856 |

```
-0.0209214 -0.3938667 -0.1581357
atom H
      v1      v2      v3
-0.3220746  0.0013388 -0.0021227
-0.1144612 -0.6401151 -0.0999477
  0.0863740  0.0033412 -0.6793350
atom C
      v1      v2      v3
-0.4536674  0.0897990 -0.0071760
  0.0801299 -0.8476843 -0.4720626
  0.0512340 -0.3104603 -0.8309582
atom C
      v1      v2      v3
  0.2834490 -0.2436776 -0.6037400
-0.0314713  0.0881364 -1.0548356
-0.5417489 -1.1697614 -1.5915429
atom H
      v1      v2      v3
-0.3987843  0.0078585 -0.0364021
  0.0107230 -0.4658779 -0.0190014
-0.0240999  0.0143172 -0.6990261
atom H
      v1      v2      v3
-0.5569819 -0.1587796  0.0358683
-0.2447128 -0.6471812  0.0043174
-0.0141103 -0.0449514 -0.4973665
atom H
```

| v1         | v2         | v3         |
|------------|------------|------------|
| -0.4326415 | 0.1024527  | 0.0383470  |
| 0.1449531  | -0.5310790 | -0.0075534 |
| 0.1151891  | -0.0511894 | -0.4246429 |

atom O

| v1         | v2         | v3         |
|------------|------------|------------|
| -2.2625743 | 0.1115846  | -0.1253914 |
| -0.2553425 | -1.5273790 | -0.3933502 |
| 0.0943755  | -0.4038597 | -2.0618113 |

atom C

| v1         | v2         | v3         |
|------------|------------|------------|
| 0.3352161  | 0.2251102  | 0.4160930  |
| -0.1368445 | 0.1199509  | -0.9943680 |
| 0.5643992  | -0.9221643 | -1.3719280 |

atom O

| v1         | v2         | v3         |
|------------|------------|------------|
| -2.2419182 | -0.1668771 | 0.1032242  |
| 0.0925507  | -1.4562477 | -0.4097719 |
| -0.0736943 | -0.4706600 | -2.1757068 |

atom C

| v1         | v2         | v3         |
|------------|------------|------------|
| -1.1857018 | -0.7207689 | 0.2961760  |
| -0.6439363 | -1.2642684 | -0.0252967 |
| 0.2519086  | -0.0288822 | -0.9068514 |

atom H

| v1         | v2         | v3        |
|------------|------------|-----------|
| -0.5141719 | -0.0726246 | 0.0125435 |

|            |            |            |
|------------|------------|------------|
| 0.0079653  | -0.6548859 | 0.1165582  |
| -0.0272364 | 0.0984399  | -0.4776816 |
| atom H     |            |            |
| v1         | v2         | v3         |
| -0.6417544 | 0.0229630  | 0.0629820  |
| -0.0331326 | -0.5067033 | -0.0713533 |
| 0.0868141  | -0.0808375 | -0.4738614 |
| atom H     |            |            |
| v1         | v2         | v3         |
| -0.5708866 | -0.0632552 | -0.0538379 |
| -0.1092879 | -0.4390476 | -0.0561805 |
| -0.0386424 | -0.0211443 | -0.6089231 |
| atom N     |            |            |
| v1         | v2         | v3         |
| -1.0413045 | -0.5721377 | 0.1179162  |
| -0.0306738 | -0.5128480 | -0.8342259 |
| -0.1554238 | -0.7618090 | -1.7645766 |
| atom C     |            |            |
| v1         | v2         | v3         |
| -0.9003596 | 0.5114560  | -0.1437038 |
| 0.3034753  | -0.5019190 | 0.0914436  |
| -0.0016961 | 0.0356015  | -0.2501868 |
| atom H     |            |            |
| v1         | v2         | v3         |
| -0.2747624 | -0.0030224 | -0.0009013 |
| -0.1634373 | -0.1869744 | 0.0028461  |
| 0.0627569  | -0.0202253 | -0.2579971 |

atom H

| v1         | v2         | v3         |
|------------|------------|------------|
| -0.3589386 | 0.1011523  | -0.0666592 |
| 0.1152436  | -0.5061890 | 0.0025768  |
| -0.0725846 | 0.0076470  | -0.4413413 |

atom H

| v1         | v2         | v3         |
|------------|------------|------------|
| -0.7506754 | -0.0990219 | -0.0577206 |
| -0.0563135 | -0.5448489 | -0.0869139 |
| -0.0477228 | -0.1147085 | -0.5610445 |

atom H

| v1         | v2         | v3         |
|------------|------------|------------|
| -0.6757912 | 0.0169387  | 0.1128688  |
| 0.0254974  | -0.4592872 | -0.0763609 |
| 0.0821736  | -0.0377088 | -0.7146431 |

ammonia

atom N

| v1         | v2         | v3         |
|------------|------------|------------|
| -0.7504792 | 0.0000000  | 0.0000431  |
| 0.0000000  | -0.7505049 | 0.0000000  |
| 0.0000127  | 0.0000000  | -1.5903887 |

atom H

| v1         | v2         | v3         |
|------------|------------|------------|
| -0.2798696 | 0.0000000  | 0.0785364  |
| 0.0000000  | -0.2329101 | 0.0000000  |
| -0.1103384 | 0.0000000  | -0.2683532 |

atom H

| v1         | v2         | v3         |
|------------|------------|------------|
| -0.2446459 | -0.0203305 | -0.0392690 |
| -0.0203255 | -0.2681237 | -0.0680134 |
| 0.0551633  | 0.0955468  | -0.2683556 |

atom H

| v1         | v2         | v3         |
|------------|------------|------------|
| -0.2446459 | 0.0203305  | -0.0392690 |
| 0.0203255  | -0.2681237 | 0.0680134  |
| 0.0551633  | -0.0955468 | -0.2683556 |

benzene

atom C

| v1         | v2         | v3         |
|------------|------------|------------|
| -0.3261430 | 0.4555814  | -0.0019792 |
| 0.4559179  | 0.2010876  | -0.0011781 |
| 0.0001256  | -0.0017521 | -3.0017797 |

atom C

| v1         | v2         | v3         |
|------------|------------|------------|
| -0.3264592 | -0.4551742 | 0.0020575  |
| -0.4553424 | 0.2010556  | -0.0026387 |
| 0.0026186  | -0.0046214 | -3.0017864 |

atom C

| v1        | v2         | v3         |
|-----------|------------|------------|
| 0.4635420 | -0.0003394 | 0.0026814  |
| 0.0005126 | -0.5891846 | 0.0005223  |
| 0.0015990 | -0.0013427 | -3.0023840 |

atom C

| v1         | v2         | v3         |
|------------|------------|------------|
| -0.3251637 | 0.4565333  | 0.0003192  |
| 0.4558382  | 0.1999260  | -0.0012028 |
| 0.0014274  | -0.0006969 | -3.0023618 |

atom C

| v1         | v2         | v3         |
|------------|------------|------------|
| -0.3251329 | -0.4562768 | 0.0010616  |
| -0.4560689 | 0.1997107  | -0.0030459 |
| 0.0009428  | -0.0023447 | -3.0020614 |

atom C

| v1         | v2         | v3         |
|------------|------------|------------|
| 0.4635867  | -0.0003156 | 0.0003713  |
| -0.0008583 | -0.5891170 | -0.0004149 |
| 0.0012617  | -0.0016237 | -3.0019962 |

atom H

| v1         | v2         | v3         |
|------------|------------|------------|
| -0.6191717 | -0.2068781 | 0.0000351  |
| -0.2066217 | -0.8579175 | 0.0001467  |
| 0.0001695  | 0.0000713  | -0.4959319 |

atom H

| v1         | v2         | v3         |
|------------|------------|------------|
| -0.6190983 | 0.2069075  | -0.0000894 |
| 0.2066412  | -0.8579831 | 0.0001644  |
| -0.0003793 | 0.0006461  | -0.4958685 |

atom H

| v1 | v2 | v3 |
|----|----|----|
|----|----|----|

|            |            |            |
|------------|------------|------------|
| -0.9773720 | 0.0000894  | -0.0002649 |
| 0.0001913  | -0.4998390 | 0.0000046  |
| -0.0001897 | -0.0000494 | -0.4957808 |

atom H

| v1         | v2         | v3         |
|------------|------------|------------|
| -0.6191573 | -0.2065949 | 0.0000617  |
| -0.2068128 | -0.8579491 | 0.0000345  |
| -0.0000319 | -0.0000176 | -0.4957521 |

atom H

| v1         | v2         | v3         |
|------------|------------|------------|
| -0.6192783 | 0.2066736  | -0.0001551 |
| 0.2069993  | -0.8580236 | 0.0001926  |
| -0.0001564 | 0.0004000  | -0.4958078 |

atom H

| v1         | v2         | v3         |
|------------|------------|------------|
| -0.9773471 | 0.0001444  | -0.0000024 |
| -0.0001095 | -0.4997644 | -0.0000316 |
| -0.0001538 | 0.0000131  | -0.4958867 |

dodecahexene

atom C

| v1         | v2         | v3         |
|------------|------------|------------|
| -0.0592488 | -0.7985771 | -0.0000001 |
| 0.6293679  | 0.1199170  | 0.0000000  |
| 0.0000000  | 0.0000000  | -3.4837955 |

atom H

| v1 | v2 | v3 |
|----|----|----|
|----|----|----|



|            |            |            |
|------------|------------|------------|
| -0.7051483 | 0.8156963  | 0.0000000  |
| 0.0551868  | -0.8436946 | 0.0000000  |
| 0.0000000  | 0.0000000  | -0.3994628 |

atom H

| v1         | v2         | v3         |
|------------|------------|------------|
| -0.5865379 | -0.4540568 | 0.0000000  |
| -0.0489167 | -1.3181695 | 0.0000000  |
| 0.0000000  | 0.0000000  | -0.4235359 |

atom C

| v1         | v2         | v3         |
|------------|------------|------------|
| 0.1326120  | -0.8233325 | -0.0000001 |
| -0.2653269 | -0.1553052 | -0.0000001 |
| 0.0000000  | 0.0000000  | -2.8967208 |

atom H

| v1         | v2         | v3         |
|------------|------------|------------|
| -0.7455702 | -0.1909998 | 0.0000000  |
| -0.0403430 | -0.4749396 | 0.0000000  |
| 0.0000000  | 0.0000000  | -0.4583720 |

atom C

| v1        | v2         | v3         |
|-----------|------------|------------|
| 0.0342760 | -2.2757167 | -0.0000001 |
| 0.0658486 | 0.0755267  | 0.0000001  |
| 0.0000000 | 0.0000000  | -3.0201516 |

atom H

| v1         | v2         | v3        |
|------------|------------|-----------|
| -0.7120615 | 0.8377642  | 0.0000000 |
| -0.0054014 | -0.4594068 | 0.0000000 |

|        |            |            |            |
|--------|------------|------------|------------|
|        | 0.0000000  | 0.0000000  | -0.4358105 |
| atom C |            |            |            |
|        | v1         | v2         | v3         |
|        | 0.0025648  | -1.6151966 | -0.0000001 |
|        | 0.0082422  | 0.0526797  | 0.0000001  |
|        | 0.0000000  | 0.0000000  | -2.9738626 |
| atom H |            |            |            |
|        | v1         | v2         | v3         |
|        | -0.7121530 | 0.1538071  | 0.0000000  |
|        | -0.0039680 | -0.3753197 | 0.0000000  |
|        | 0.0000000  | 0.0000000  | -0.4380521 |
| atom C |            |            |            |
|        | v1         | v2         | v3         |
|        | -0.0152142 | -2.1459873 | -0.0000001 |
|        | 0.0175463  | -0.0065948 | 0.0000000  |
|        | 0.0000000  | 0.0000000  | -2.9744237 |
| atom H |            |            |            |
|        | v1         | v2         | v3         |
|        | -0.6968752 | 0.6180483  | 0.0000000  |
|        | -0.0011210 | -0.4119762 | 0.0000000  |
|        | 0.0000000  | 0.0000000  | -0.4367485 |
| atom C |            |            |            |
|        | v1         | v2         | v3         |
|        | -0.0182066 | -1.9267068 | 0.0000000  |
|        | 0.0149777  | 0.0090277  | 0.0000001  |
|        | 0.0000000  | 0.0000000  | -2.9701222 |
| atom H |            |            |            |

| v1         | v2         | v3         |
|------------|------------|------------|
| -0.6995008 | 0.3922661  | 0.0000000  |
| -0.0016579 | -0.3859908 | 0.0000000  |
| 0.0000000  | 0.0000000  | -0.4360730 |

atom C

| v1         | v2         | v3         |
|------------|------------|------------|
| -0.0182066 | -1.9267068 | 0.0000000  |
| 0.0149777  | 0.0090278  | -0.0000001 |
| 0.0000000  | 0.0000000  | -2.9701222 |

atom H

| v1         | v2         | v3         |
|------------|------------|------------|
| -0.6995008 | 0.3922661  | 0.0000000  |
| -0.0016579 | -0.3859908 | 0.0000000  |
| 0.0000000  | 0.0000000  | -0.4360730 |

atom C

| v1         | v2         | v3         |
|------------|------------|------------|
| -0.0152143 | -2.1459875 | 0.0000001  |
| 0.0175463  | -0.0065948 | 0.0000000  |
| 0.0000000  | 0.0000000  | -2.9744237 |

atom H

| v1         | v2         | v3         |
|------------|------------|------------|
| -0.6968752 | 0.6180484  | 0.0000000  |
| -0.0011210 | -0.4119762 | 0.0000000  |
| 0.0000000  | 0.0000000  | -0.4367485 |

atom C

| v1        | v2         | v3        |
|-----------|------------|-----------|
| 0.0025648 | -1.6151967 | 0.0000001 |

|            |            |            |
|------------|------------|------------|
| 0.0082423  | 0.0526799  | -0.0000001 |
| 0.0000000  | 0.0000000  | -2.9738626 |
| atom H     |            |            |
| v1         | v2         | v3         |
| -0.7121529 | 0.1538071  | 0.0000000  |
| -0.0039680 | -0.3753197 | 0.0000000  |
| 0.0000000  | 0.0000000  | -0.4380521 |
| atom C     |            |            |
| v1         | v2         | v3         |
| 0.0342760  | -2.2757169 | 0.0000001  |
| 0.0658487  | 0.0755268  | -0.0000001 |
| 0.0000000  | 0.0000000  | -3.0201516 |
| atom H     |            |            |
| v1         | v2         | v3         |
| -0.7120614 | 0.8377642  | 0.0000000  |
| -0.0054014 | -0.4594068 | 0.0000000  |
| 0.0000000  | 0.0000000  | -0.4358105 |
| atom C     |            |            |
| v1         | v2         | v3         |
| 0.1326120  | -0.8233326 | 0.0000001  |
| -0.2653269 | -0.1553052 | 0.0000001  |
| 0.0000000  | 0.0000000  | -2.8967208 |
| atom H     |            |            |
| v1         | v2         | v3         |
| -0.7455702 | -0.1909998 | 0.0000000  |
| -0.0403430 | -0.4749396 | 0.0000000  |
| 0.0000000  | 0.0000000  | -0.4583720 |

atom C

| v1         | v2         | v3         |
|------------|------------|------------|
| -0.0592488 | -0.7985772 | 0.0000001  |
| 0.6293679  | 0.1199170  | 0.0000000  |
| 0.0000000  | 0.0000000  | -3.4837955 |

atom H

| v1         | v2         | v3         |
|------------|------------|------------|
| -0.7051483 | 0.8156963  | 0.0000000  |
| 0.0551868  | -0.8436946 | 0.0000000  |
| 0.0000000  | 0.0000000  | -0.3994628 |

atom H

| v1         | v2         | v3         |
|------------|------------|------------|
| -0.5865379 | -0.4540568 | 0.0000000  |
| -0.0489167 | -1.3181695 | 0.0000000  |
| 0.0000000  | 0.0000000  | -0.4235359 |

ethanol

atom C

| v1         | v2         | v3         |
|------------|------------|------------|
| -0.9934320 | 0.5964475  | -0.0000262 |
| 0.3106359  | -0.6803925 | 0.0000336  |
| -0.0001060 | -0.0000041 | -0.4901134 |

atom H

| v1         | v2         | v3         |
|------------|------------|------------|
| -0.4885565 | 0.1141941  | -0.0429643 |
| 0.0583684  | -0.5520594 | 0.1639591  |
| 0.0181959  | 0.1189422  | -0.6377811 |

atom H

| v1         | v2         | v3         |
|------------|------------|------------|
| -0.6824808 | -0.1666219 | 0.0000232  |
| -0.0914902 | -0.6335277 | 0.0000271  |
| 0.0000089  | 0.0000383  | -0.4497592 |

atom H

| v1         | v2         | v3         |
|------------|------------|------------|
| -0.4885325 | 0.1142153  | 0.0429717  |
| 0.0583607  | -0.5520980 | -0.1639482 |
| -0.0182366 | -0.1189430 | -0.6377009 |

atom C

| v1         | v2        | v3         |
|------------|-----------|------------|
| -0.6878984 | 0.2704365 | -0.0000459 |
| -0.0305659 | 0.0569857 | 0.0000915  |
| -0.0002806 | 0.0000101 | 0.1610352  |

atom H

| v1         | v2         | v3         |
|------------|------------|------------|
| -0.6160479 | 0.1167121  | 0.0605116  |
| -0.0026099 | -0.7254584 | -0.2068020 |
| -0.0189487 | -0.1554415 | -0.8020646 |

atom H

| v1         | v2         | v3         |
|------------|------------|------------|
| -0.6161811 | 0.1167550  | -0.0605429 |
| -0.0027142 | -0.7255049 | 0.2068525  |
| 0.0190068  | 0.1555165  | -0.8021036 |

atom O

| v1 | v2 | v3 |
|----|----|----|
|----|----|----|

|            |            |            |
|------------|------------|------------|
| -0.5978902 | -0.6736576 | -0.0009457 |
| -0.9713786 | -1.4387588 | 0.0008958  |
| -0.0015286 | 0.0005904  | -1.7901578 |

atom H

| v1         | v2         | v3         |
|------------|------------|------------|
| -0.1785046 | -0.1366415 | -0.0000957 |
| -0.0577066 | -0.2175625 | 0.0000886  |
| -0.0001617 | 0.0001507  | -0.2111119 |

formamide

atom C

| v1         | v2         | v3         |
|------------|------------|------------|
| 0.7625248  | -0.3156267 | 0.0000000  |
| -0.3238891 | 0.4282926  | 0.0000000  |
| 0.0000000  | 0.0000000  | -2.7764171 |

atom H

| v1         | v2         | v3         |
|------------|------------|------------|
| -0.7870110 | -0.0687880 | 0.0000000  |
| 0.1385660  | -0.5328235 | 0.0000000  |
| 0.0000000  | 0.0000000  | -0.7064032 |

atom O

| v1         | v2         | v3         |
|------------|------------|------------|
| -1.3219010 | 0.1298099  | 0.0000000  |
| -0.2274134 | -1.9580411 | 0.0000000  |
| 0.0000000  | 0.0000000  | -2.6391493 |

atom N

| v1 | v2 | v3 |
|----|----|----|
|----|----|----|

|            |            |            |
|------------|------------|------------|
| -0.4448007 | -0.6931846 | 0.0000000  |
| -0.8521426 | -0.4947278 | 0.0000000  |
| 0.0000000  | 0.0000000  | -3.0723831 |

atom H

| v1         | v2         | v3         |
|------------|------------|------------|
| -0.2422073 | -0.0352536 | 0.0000000  |
| 0.0047786  | -0.2761542 | 0.0000000  |
| 0.0000000  | 0.0000000  | -0.2369366 |

atom H

| v1         | v2         | v3         |
|------------|------------|------------|
| -0.2686623 | 0.0157427  | 0.0000000  |
| -0.0179312 | -0.2704416 | 0.0000000  |
| 0.0000000  | 0.0000000  | -0.2413642 |

formic acid

atom C

| v1         | v2         | v3         |
|------------|------------|------------|
| 0.7057304  | -0.1864738 | 0.0000001  |
| -0.4190412 | 0.4879185  | 0.0000000  |
| 0.0000000  | 0.0000000  | -3.0199824 |

atom O

| v1         | v2         | v3         |
|------------|------------|------------|
| -0.0719276 | 0.3291280  | -0.0000001 |
| -0.2313009 | -1.8905272 | 0.0000002  |
| 0.0000000  | 0.0000000  | -2.2790971 |

atom O

| v1 | v2 | v3 |
|----|----|----|
|----|----|----|



|            |            |            |
|------------|------------|------------|
| -1.8683403 | -0.4413852 | 0.0000001  |
| -0.1971065 | -1.3787412 | -0.0000001 |
| 0.0000000  | 0.0000000  | -2.6110372 |

atom H

| v1         | v2         | v3         |
|------------|------------|------------|
| -0.5975976 | 0.1461551  | -0.0000001 |
| 0.0324567  | -0.6199021 | 0.0000000  |
| 0.0000000  | 0.0000000  | -0.6959858 |

atom H

| v1         | v2         | v3         |
|------------|------------|------------|
| -0.1347217 | -0.1323269 | 0.0000000  |
| 0.0164738  | -0.1810925 | 0.0000000  |
| 0.0000000  | 0.0000000  | -0.2335619 |

indole

atom C

| v1         | v2         | v3         |
|------------|------------|------------|
| -1.0757244 | -0.4002163 | 0.0000001  |
| -0.3093439 | 0.3344652  | -0.0000001 |
| 0.0000000  | 0.0000000  | -3.4182537 |

atom C

| v1        | v2         | v3         |
|-----------|------------|------------|
| 0.4476992 | 0.1726081  | 0.0000000  |
| 0.6805337 | -0.3444066 | -0.0000002 |
| 0.0000000 | 0.0000000  | -3.0984392 |

atom C

| v1 | v2 | v3 |
|----|----|----|
|----|----|----|

|        |            |            |            |
|--------|------------|------------|------------|
|        | 0.0098750  | 0.0919420  | 0.0000000  |
|        | -0.0732785 | -0.3196276 | -0.0000002 |
|        | 0.0000000  | 0.0000000  | -2.5930876 |
| atom H |            |            |            |
|        | v1         | v2         | v3         |
|        | -0.9919264 | -0.0508218 | 0.0000000  |
|        | -0.0073660 | -0.5497747 | 0.0000000  |
|        | 0.0000000  | 0.0000000  | -0.5318904 |
| atom N |            |            |            |
|        | v1         | v2         | v3         |
|        | -0.5411446 | 0.2762591  | 0.0000000  |
|        | 0.0868033  | 0.0509203  | 0.0000000  |
|        | 0.0000000  | 0.0000000  | -2.4558887 |
| atom C |            |            |            |
|        | v1         | v2         | v3         |
|        | 0.0332782  | -0.1042581 | 0.0000000  |
|        | 0.1044595  | -0.3067755 | -0.0000001 |
|        | 0.0000000  | 0.0000000  | -2.5146189 |
| atom C |            |            |            |
|        | v1         | v2         | v3         |
|        | -0.5772248 | -0.2270594 | 0.0000000  |
|        | 0.0648678  | 0.5325647  | -0.0000001 |
|        | 0.0000000  | 0.0000000  | -3.0375586 |
| atom H |            |            |            |
|        | v1         | v2         | v3         |
|        | -0.2720134 | 0.0096547  | 0.0000000  |
|        | -0.0389826 | -0.2414816 | 0.0000000  |

|        |            |            |            |
|--------|------------|------------|------------|
|        | 0.0000000  | 0.0000000  | -0.2843844 |
| atom C |            |            |            |
|        | v1         | v2         | v3         |
|        | -0.5882442 | 0.2625779  | 0.0000000  |
|        | 0.1241939  | 0.3448471  | 0.0000000  |
|        | 0.0000000  | 0.0000000  | -3.2416983 |
| atom C |            |            |            |
|        | v1         | v2         | v3         |
|        | 0.1343727  | 0.4013176  | 0.0000001  |
|        | 0.3686318  | -0.4852394 | -0.0000001 |
|        | 0.0000000  | 0.0000000  | -3.0194334 |
| atom H |            |            |            |
|        | v1         | v2         | v3         |
|        | -0.5188008 | -0.0752729 | 0.0000000  |
|        | -0.1137913 | -0.9802395 | 0.0000000  |
|        | 0.0000000  | 0.0000000  | -0.4899280 |
| atom H |            |            |            |
|        | v1         | v2         | v3         |
|        | -0.4957600 | 0.0223145  | 0.0000000  |
|        | 0.0594563  | -0.9705218 | 0.0000000  |
|        | 0.0000000  | 0.0000000  | -0.4730490 |
| atom C |            |            |            |
|        | v1         | v2         | v3         |
|        | 0.1766096  | -0.4029834 | 0.0000000  |
|        | -0.4332830 | -0.3619180 | 0.0000000  |
|        | 0.0000000  | 0.0000000  | -2.9303153 |
| atom H |            |            |            |

| v1         | v2         | v3         |
|------------|------------|------------|
| -0.9089179 | -0.1631086 | 0.0000000  |
| -0.2536778 | -0.5732046 | 0.0000000  |
| 0.0000000  | 0.0000000  | -0.4892152 |

atom H

| v1         | v2         | v3         |
|------------|------------|------------|
| -0.9221709 | 0.1751435  | 0.0000000  |
| 0.2791429  | -0.5995877 | 0.0000000  |
| 0.0000000  | 0.0000000  | -0.4968527 |

atom H

| v1         | v2         | v3         |
|------------|------------|------------|
| -0.6436717 | 0.1869761  | 0.0000000  |
| 0.1377775  | -0.7804097 | 0.0000000  |
| 0.0000000  | 0.0000000  | -0.4676665 |

methanal

atom C

| v1        | v2        | v3         |
|-----------|-----------|------------|
| 0.6868329 | 0.0001863 | 0.0000000  |
| 0.0001527 | 0.5005146 | 0.0000001  |
| 0.0000000 | 0.0000000 | -3.2878282 |

atom H

| v1         | v2         | v3         |
|------------|------------|------------|
| -1.0091540 | 0.3069968  | 0.0000000  |
| 0.1365780  | -0.7980365 | 0.0000000  |
| 0.0000000  | 0.0000000  | -0.5094599 |

atom H

|  | v1         | v2         | v3         |
|--|------------|------------|------------|
|  | -1.0091804 | -0.3070228 | 0.0000000  |
|  | -0.1365972 | -0.7981388 | 0.0000000  |
|  | 0.0000000  | 0.0000000  | -0.5094465 |

atom O

|  | v1         | v2         | v3         |
|--|------------|------------|------------|
|  | -1.7561311 | -0.0000191 | 0.0000000  |
|  | 0.0000324  | -1.0456250 | 0.0000001  |
|  | 0.0000000  | 0.0000000  | -2.4558877 |

methane

atom C

|  | v1         | v2         | v3         |
|--|------------|------------|------------|
|  | -0.7606964 | 0.0000000  | 0.0000000  |
|  | 0.0000000  | -0.7606964 | 0.0000000  |
|  | 0.0000000  | 0.0000000  | -0.7606964 |

atom H

|  | v1         | v2         | v3         |
|--|------------|------------|------------|
|  | -0.5296715 | -0.1194060 | -0.1194060 |
|  | -0.1194060 | -0.5296715 | -0.1194060 |
|  | -0.1194060 | -0.1194060 | -0.5296715 |

atom H

|  | v1         | v2         | v3         |
|--|------------|------------|------------|
|  | -0.5296715 | -0.1194060 | 0.1194060  |
|  | -0.1194060 | -0.5296715 | 0.1194060  |
|  | 0.1194060  | 0.1194060  | -0.5296715 |

atom H

| v1         | v2         | v3         |
|------------|------------|------------|
| -0.5296715 | 0.1194060  | -0.1194060 |
| 0.1194060  | -0.5296715 | 0.1194060  |
| -0.1194060 | 0.1194060  | -0.5296715 |

atom H

| v1         | v2         | v3         |
|------------|------------|------------|
| -0.5296715 | 0.1194060  | 0.1194060  |
| 0.1194060  | -0.5296715 | -0.1194060 |
| 0.1194060  | -0.1194060 | -0.5296715 |

methanol

atom C

| v1         | v2         | v3         |
|------------|------------|------------|
| -0.3939812 | -0.2551662 | -0.0000001 |
| 0.0213391  | -0.0759758 | -0.0000015 |
| -0.0000006 | -0.0000016 | -0.1489313 |

atom H

| v1         | v2         | v3         |
|------------|------------|------------|
| -0.4598367 | -0.1405109 | -0.0000001 |
| -0.0775538 | -0.7113364 | 0.0000000  |
| -0.0000004 | 0.0000000  | -0.5005198 |

atom H

| v1         | v2         | v3         |
|------------|------------|------------|
| -0.5397625 | 0.0662841  | 0.1053318  |
| 0.1020467  | -0.6066487 | -0.1451177 |
| 0.1051514  | -0.1760383 | -0.8147127 |

atom H

| v1         | v2         | v3         |
|------------|------------|------------|
| -0.5397628 | 0.0662839  | -0.1053320 |
| 0.1020461  | -0.6066489 | 0.1451174  |
| -0.1051514 | 0.1760379  | -0.8147128 |

atom O

| v1         | v2         | v3         |
|------------|------------|------------|
| -1.7785099 | 0.3126090  | 0.0000007  |
| 0.7819634  | -0.3229474 | -0.0000006 |
| -0.0000001 | -0.0000002 | -1.8734590 |

atom H

| v1         | v2         | v3         |
|------------|------------|------------|
| -0.3108370 | 0.0440295  | 0.0000001  |
| 0.0342318  | -0.0756808 | -0.0000001 |
| 0.0000000  | 0.0000000  | -0.2099355 |

methyl ether

atom C

| v1         | v2         | v3         |
|------------|------------|------------|
| -0.4397525 | 0.1175586  | -0.0000021 |
| 0.0951992  | -0.1379864 | -0.0000233 |
| 0.0000094  | -0.0000136 | -0.1748961 |

atom H

| v1         | v2         | v3         |
|------------|------------|------------|
| -0.6097519 | -0.2009660 | 0.0000173  |
| -0.1352294 | -0.5687755 | 0.0000177  |
| 0.0000106  | 0.0000194  | -0.4912609 |

atom H

|        | v1         | v2         | v3         |
|--------|------------|------------|------------|
|        | -0.4944155 | -0.0209379 | 0.0053370  |
|        | 0.0941765  | -0.6297882 | -0.1968057 |
|        | 0.0710159  | -0.2087855 | -0.8091984 |
| atom H |            |            |            |
|        | v1         | v2         | v3         |
|        | -0.4944466 | -0.0209349 | -0.0053657 |
|        | 0.0941728  | -0.6297402 | 0.1967846  |
|        | -0.0710584 | 0.2087645  | -0.8092516 |
| atom O |            |            |            |
|        | v1         | v2         | v3         |
|        | -1.5138264 | 0.0000005  | -0.0000105 |
|        | 0.0000000  | -1.3095459 | -0.0000083 |
|        | 0.0000054  | -0.0000164 | -1.4919609 |
| atom C |            |            |            |
|        | v1         | v2         | v3         |
|        | -0.4397530 | -0.1175585 | -0.0000150 |
|        | -0.0951998 | -0.1379881 | 0.0000060  |
|        | -0.0000036 | 0.0000030  | -0.1748959 |
| atom H |            |            |            |
|        | v1         | v2         | v3         |
|        | -0.4944284 | 0.0209331  | 0.0053532  |
|        | -0.0941779 | -0.6297630 | 0.1967946  |
|        | 0.0710376  | 0.2087764  | -0.8092251 |
| atom H |            |            |            |
|        | v1         | v2         | v3         |
|        | -0.6097520 | 0.2009660  | 0.0000011  |



|            |            |            |
|------------|------------|------------|
| 0.1352296  | -0.5687754 | 0.0000008  |
| -0.0000013 | 0.0000001  | -0.4912607 |

atom H

| v1         | v2         | v3         |
|------------|------------|------------|
| -0.4944333 | 0.0209398  | -0.0053493 |
| -0.0941715 | -0.6297649 | -0.1967950 |
| -0.0710364 | -0.2087728 | -0.8092238 |

mNA

atom C

| v1         | v2         | v3         |
|------------|------------|------------|
| -0.5878961 | -0.3427614 | 0.0070704  |
| -0.1579832 | 0.2623399  | 0.0505274  |
| -0.0110286 | 0.0162238  | -2.7608197 |

atom C

| v1         | v2        | v3         |
|------------|-----------|------------|
| -0.4209692 | 0.7987657 | 0.0642919  |
| -0.0108582 | 0.0385690 | 0.1031180  |
| -0.0248588 | 0.0403339 | -3.3081118 |

atom C

| v1         | v2         | v3         |
|------------|------------|------------|
| 0.1779713  | -0.4656779 | -0.1807375 |
| -0.3812486 | 0.1749158  | 0.1839345  |
| 0.0454072  | -0.0303533 | -2.1959685 |

atom C

| v1        | v2        | v3         |
|-----------|-----------|------------|
| 0.3301796 | 0.3646035 | -0.0833635 |

|        |            |            |            |
|--------|------------|------------|------------|
|        | 0.3038803  | -0.7271160 | -0.0590351 |
|        | -0.0422163 | 0.0150575  | -3.2487574 |
| atom C |            |            |            |
|        | v1         | v2         | v3         |
|        | -0.4564423 | 0.2816834  | -0.0212418 |
|        | 0.1952750  | 0.3506259  | 0.0144604  |
|        | -0.0057136 | 0.0243885  | -2.8172292 |
| atom C |            |            |            |
|        | v1         | v2         | v3         |
|        | -0.0304223 | -0.8211261 | -0.0085671 |
|        | -0.0511432 | -0.5275009 | 0.0152405  |
|        | 0.0019383  | 0.0096024  | -3.1169637 |
| atom H |            |            |            |
|        | v1         | v2         | v3         |
|        | -0.2037651 | 0.0609877  | -0.0024582 |
|        | 0.0055942  | -0.6738360 | -0.0106483 |
|        | -0.0002805 | -0.0002713 | -0.4308453 |
| atom H |            |            |            |
|        | v1         | v2         | v3         |
|        | -0.8840038 | -0.1971469 | 0.0086578  |
|        | -0.1736455 | -0.5333334 | 0.0080967  |
|        | -0.0015436 | -0.0014661 | -0.4542345 |
| atom H |            |            |            |
|        | v1         | v2         | v3         |
|        | -0.4922306 | -0.0961057 | -0.0037352 |
|        | -0.1040098 | -0.8591020 | -0.0002533 |
|        | -0.0003995 | -0.0038927 | -0.4966031 |

atom H

| v1         | v2         | v3         |
|------------|------------|------------|
| -0.3376810 | 0.1999207  | -0.0071985 |
| 0.2061159  | -0.6413286 | -0.0094600 |
| 0.0005429  | -0.0009547 | -0.4596046 |

atom N

| v1         | v2         | v3         |
|------------|------------|------------|
| 0.4120033  | -0.0948033 | -0.0589240 |
| -0.1163000 | 0.9206591  | 0.1032047  |
| -0.0079677 | -0.0079536 | -1.8344499 |

atom N

| v1         | v2         | v3         |
|------------|------------|------------|
| -1.2289820 | 1.0594192  | 0.3334494  |
| 1.0924286  | -0.9501268 | -0.2546589 |
| 1.7578688  | -1.3812122 | -2.1879669 |

atom O

| v1         | v2         | v3         |
|------------|------------|------------|
| -1.8640577 | 0.2208319  | -0.0983103 |
| -0.4386099 | -1.4860105 | 0.0821401  |
| -0.0002315 | -0.0006195 | -2.1702387 |

atom O

| v1         | v2         | v3         |
|------------|------------|------------|
| -1.8961303 | -0.3018103 | 0.0079881  |
| 0.1079258  | -1.1240404 | 0.0330689  |
| -0.0006778 | -0.0026196 | -2.1660386 |

atom H

| v1 | v2 | v3 |
|----|----|----|
|----|----|----|

|            |            |            |
|------------|------------|------------|
| -0.2760541 | 0.0646931  | -0.0166808 |
| 0.0641427  | -0.2760450 | -0.0813988 |
| -0.0104652 | 0.0424623  | -0.2563581 |

atom H

| v1         | v2         | v3         |
|------------|------------|------------|
| -0.3004540 | 0.0535138  | 0.0807618  |
| 0.0688060  | -0.2516556 | 0.0205667  |
| -0.0456990 | 0.0096654  | -0.2585732 |

neopentane

atom C

| v1         | v2         | v3         |
|------------|------------|------------|
| -0.3685463 | 0.0000021  | 0.0000000  |
| -0.0000782 | -0.3683128 | 0.0000000  |
| 0.0000000  | 0.0000000  | -0.3686156 |

atom C

| v1         | v2         | v3         |
|------------|------------|------------|
| -0.4850946 | 0.2208019  | 0.0000000  |
| 0.2214692  | -1.0322129 | 0.0000000  |
| 0.0000000  | 0.0000000  | -0.4068986 |

atom C

| v1         | v2         | v3         |
|------------|------------|------------|
| -1.1052741 | -0.0005360 | 0.0000000  |
| -0.0002102 | -0.4075686 | 0.0000000  |
| 0.0000000  | 0.0000000  | -0.4070112 |

atom C

| v1 | v2 | v3 |
|----|----|----|
|----|----|----|

|            |            |            |
|------------|------------|------------|
| -0.4855135 | -0.1099931 | -0.1902966 |
| -0.1103326 | -0.5621969 | -0.2694254 |
| -0.1906188 | -0.2695283 | -0.8738739 |

atom C

| v1         | v2         | v3         |
|------------|------------|------------|
| -0.4855135 | -0.1099931 | 0.1902966  |
| -0.1103326 | -0.5621969 | 0.2694253  |
| 0.1906188  | 0.2695283  | -0.8738739 |

atom H

| v1         | v2         | v3         |
|------------|------------|------------|
| -0.7740279 | 0.0513560  | 0.0000000  |
| 0.1198674  | -0.5128784 | 0.0000000  |
| 0.0000000  | 0.0000000  | -0.4054088 |

atom H

| v1         | v2         | v3         |
|------------|------------|------------|
| -0.4433135 | -0.0033285 | 0.0638537  |
| -0.0375666 | -0.6293831 | 0.1906693  |
| 0.0836333  | 0.1346017  | -0.6197671 |

atom H

| v1         | v2         | v3         |
|------------|------------|------------|
| -0.4433135 | -0.0033285 | -0.0638537 |
| -0.0375666 | -0.6293831 | -0.1906693 |
| -0.0836333 | -0.1346017 | -0.6197671 |

atom H

| v1         | v2         | v3        |
|------------|------------|-----------|
| -0.5959339 | 0.1830324  | 0.0000000 |
| 0.1143709  | -0.6915039 | 0.0000000 |

|        |            |            |            |
|--------|------------|------------|------------|
|        | 0.0000000  | 0.0000000  | -0.4053469 |
| atom H |            |            |            |
|        | v1         | v2         | v3         |
|        | -0.5957922 | -0.0915435 | -0.1584653 |
|        | -0.0572027 | -0.4769435 | -0.1239066 |
|        | -0.0990358 | -0.1239450 | -0.6200586 |
| atom H |            |            |            |
|        | v1         | v2         | v3         |
|        | -0.5957922 | -0.0915435 | 0.1584653  |
|        | -0.0572027 | -0.4769435 | 0.1239066  |
|        | 0.0990358  | 0.1239450  | -0.6200586 |
| atom H |            |            |            |
|        | v1         | v2         | v3         |
|        | -0.4434179 | -0.0537216 | 0.0351697  |
|        | -0.0537960 | -0.4812756 | 0.0490265  |
|        | 0.0749076  | 0.1049876  | -0.7678999 |
| atom H |            |            |            |
|        | v1         | v2         | v3         |
|        | -0.7743249 | -0.0252005 | -0.0446274 |
|        | -0.0596219 | -0.4319981 | -0.0465509 |
|        | -0.1040286 | -0.0464614 | -0.4860850 |
| atom H |            |            |            |
|        | v1         | v2         | v3         |
|        | -0.4432888 | 0.0567181  | -0.0292231 |
|        | 0.0908940  | -0.7633245 | -0.0571493 |
|        | -0.0095316 | -0.1133199 | -0.4859907 |
| atom H |            |            |            |

| v1         | v2         | v3         |
|------------|------------|------------|
| -0.4434179 | -0.0537216 | -0.0351697 |
| -0.0537960 | -0.4812756 | -0.0490265 |
| -0.0749076 | -0.1049876 | -0.7678999 |

atom H

| v1         | v2         | v3         |
|------------|------------|------------|
| -0.4432888 | 0.0567181  | 0.0292230  |
| 0.0908940  | -0.7633245 | 0.0571494  |
| 0.0095316  | 0.1133199  | -0.4859907 |

atom H

| v1         | v2         | v3         |
|------------|------------|------------|
| -0.7743249 | -0.0252005 | 0.0446274  |
| -0.0596219 | -0.4319981 | 0.0465509  |
| 0.1040286  | 0.0464614  | -0.4860850 |

pNA

atom C

| v1         | v2         | v3         |
|------------|------------|------------|
| -0.7852878 | 0.5895783  | -0.0121810 |
| 0.7261700  | -0.0342528 | -0.0959464 |
| -0.0489802 | -0.0073232 | -3.2969274 |

atom C

| v1         | v2         | v3         |
|------------|------------|------------|
| 0.8244713  | 0.0000871  | -0.2218750 |
| -0.0000770 | -0.0822032 | -0.0000663 |
| 0.0434841  | -0.0000625 | -2.1741817 |

atom C

| v1         | v2         | v3         |
|------------|------------|------------|
| -0.7849038 | -0.5894752 | -0.0120573 |
| -0.7261432 | -0.0342872 | 0.0957873  |
| -0.0490395 | 0.0073242  | -3.2969060 |

atom C

| v1         | v2         | v3         |
|------------|------------|------------|
| 0.3317436  | 0.5741726  | -0.0169794 |
| -0.2122209 | 0.0593672  | 0.0103951  |
| -0.0171863 | -0.0044495 | -2.8184487 |

atom C

| v1         | v2         | v3         |
|------------|------------|------------|
| -1.0070584 | 0.0001559  | -0.0004757 |
| 0.0002977  | -0.1115539 | 0.0000946  |
| 0.0038882  | 0.0000258  | -3.0786341 |

atom C

| v1         | v2         | v3         |
|------------|------------|------------|
| 0.3316152  | -0.5737051 | -0.0171712 |
| 0.2123687  | 0.0598105  | -0.0103225 |
| -0.0172524 | 0.0045022  | -2.8184596 |

atom H

| v1         | v2         | v3         |
|------------|------------|------------|
| -0.5399596 | -0.1592085 | 0.0000730  |
| -0.1979045 | -0.7913976 | 0.0113939  |
| -0.0035196 | -0.0010077 | -0.4515624 |

atom H

| v1         | v2        | v3        |
|------------|-----------|-----------|
| -0.5399226 | 0.1591302 | 0.0000577 |



|            |            |            |
|------------|------------|------------|
| 0.1979273  | -0.7914217 | -0.0113741 |
| -0.0035359 | 0.0010154  | -0.4515675 |
| atom H     |            |            |
| v1         | v2         | v3         |
| -0.1820085 | -0.0358651 | -0.0033873 |
| -0.1245994 | -0.7023299 | 0.0009525  |
| 0.0015385  | 0.0005252  | -0.4784755 |
| atom H     |            |            |
| v1         | v2         | v3         |
| -0.1823642 | 0.0358513  | -0.0034288 |
| 0.1244065  | -0.7023103 | -0.0009836 |
| 0.0015361  | -0.0005365 | -0.4784708 |
| atom N     |            |            |
| v1         | v2         | v3         |
| -2.2163719 | -0.0000712 | 0.3912763  |
| 0.0000026  | 0.0482039  | 0.0000536  |
| 2.2658329  | -0.0001141 | -2.3757073 |
| atom H     |            |            |
| v1         | v2         | v3         |
| -0.3521522 | -0.0082129 | 0.0393171  |
| -0.0191707 | -0.2117556 | 0.0628752  |
| -0.0591238 | -0.0183683 | -0.2547445 |
| atom H     |            |            |
| v1         | v2         | v3         |
| -0.3521482 | 0.0081839  | 0.0393005  |
| 0.0192123  | -0.2116875 | -0.0628736 |
| -0.0591096 | 0.0183488  | -0.2547434 |

atom N

| v1         | v2         | v3         |
|------------|------------|------------|
| 0.5301672  | -0.0004516 | -0.0107681 |
| 0.0017070  | 1.3352426  | 0.0003453  |
| -0.0081292 | 0.0000802  | -1.7986905 |

atom O

| v1         | v2         | v3         |
|------------|------------|------------|
| -1.9841765 | 0.0067786  | -0.0025616 |
| -0.1617140 | -1.0734985 | 0.0001737  |
| -0.0000396 | 0.0000770  | -2.1782327 |

atom O

| v1         | v2         | v3         |
|------------|------------|------------|
| -1.9827962 | -0.0074158 | -0.0023579 |
| 0.1637613  | -1.0742059 | 0.0001842  |
| -0.0000318 | -0.0000236 | -2.1782265 |

thymine

atom N

| v1         | v2         | v3         |
|------------|------------|------------|
| -0.2375400 | 0.5494737  | -0.9193050 |
| -0.0123591 | -1.9483788 | -0.9108052 |
| -0.1178844 | -0.9222372 | -1.7714308 |

atom C

| v1         | v2         | v3         |
|------------|------------|------------|
| 0.5252991  | -0.0773412 | -0.3813346 |
| -0.1467767 | -1.5241090 | -1.4434956 |
| -0.3328247 | -1.4903307 | -1.1052357 |

atom H

| v1         | v2         | v3         |
|------------|------------|------------|
| -0.7827293 | -0.0159548 | 0.0521281  |
| 0.1140899  | -0.4874883 | -0.0537869 |
| -0.0836965 | -0.0319652 | -0.4755524 |

atom C

| v1         | v2         | v3         |
|------------|------------|------------|
| -1.0800032 | -0.1607748 | -0.1425105 |
| 0.0739944  | -1.6346286 | -1.4199328 |
| -0.3779449 | -1.4330107 | -1.2007801 |

atom C

| v1         | v2         | v3         |
|------------|------------|------------|
| -0.1687116 | 0.1521563  | -0.2268859 |
| -0.1637441 | -1.1207958 | 0.6043085  |
| 0.1110756  | 0.5394299  | -1.2012485 |

atom H

| v1         | v2         | v3         |
|------------|------------|------------|
| -0.3613145 | 0.0234785  | 0.0217701  |
| -0.0305208 | -0.6039648 | 0.0615796  |
| 0.0739786  | -0.0109949 | -0.7033955 |

atom H

| v1         | v2         | v3         |
|------------|------------|------------|
| -0.3890676 | -0.0739539 | -0.0528853 |
| -0.1449667 | -0.6371598 | 0.0236943  |
| 0.0193074  | 0.0896968  | -0.5951065 |

atom H

| v1 | v2 | v3 |
|----|----|----|
|----|----|----|

|            |            |            |
|------------|------------|------------|
| -0.6475179 | 0.0736271  | -0.0243121 |
| 0.1203212  | -0.5616516 | 0.0894805  |
| -0.0740479 | 0.1124644  | -0.5454462 |

atom C

| v1         | v2         | v3         |
|------------|------------|------------|
| 0.5797149  | -0.2306882 | -0.1583796 |
| 0.0339864  | -1.1631990 | -1.1537461 |
| -0.5602424 | -1.1554632 | -0.7463966 |

atom O

| v1         | v2         | v3         |
|------------|------------|------------|
| -1.7542815 | 0.0716505  | -0.0613082 |
| 0.1385938  | -2.1914733 | -0.4000239 |
| -0.3146469 | -0.4404155 | -2.0530199 |

atom N

| v1         | v2         | v3         |
|------------|------------|------------|
| -0.1861247 | -0.6723471 | 0.2458863  |
| -0.6595277 | -1.9538741 | -1.0674575 |
| 0.1091562  | -0.9478245 | -1.9055316 |

atom H

| v1         | v2         | v3         |
|------------|------------|------------|
| -0.2278718 | 0.0135404  | -0.0178598 |
| 0.0363100  | -0.2199793 | -0.0449999 |
| -0.0391157 | -0.0390474 | -0.2043565 |

atom C

| v1         | v2         | v3         |
|------------|------------|------------|
| -0.0605850 | -0.2544561 | 0.0194748  |
| -0.1494353 | -0.5269580 | -1.6705614 |

-0.1249271 -1.5716560 -0.2722819

atom O

v1 v2 v3

-1.9952043 -0.0264576 -0.0721446

-0.0999438 -2.2300514 -0.5671693

-0.0016438 -0.5305117 -2.1137176

atom H

v1 v2 v3

-0.1443628 0.0338938 -0.0533539

-0.0488832 -0.2474265 -0.0109870

0.0337417 -0.0161359 -0.2428430

uracil

atom N

v1 v2 v3

-2.7153069 -0.3510627 -0.1352221

-0.4305687 -0.0282316 -0.4662412

-0.3780478 0.3819299 -1.2128114

atom C

v1 v2 v3

-2.4619570 -0.7685600 -0.3908359

-0.8287393 0.4230222 0.2221700

-0.2051004 -0.1259027 0.1529999

atom H

v1 v2 v3

-0.5552888 0.0567770 0.0274960

0.0183722 -0.6126771 -0.0846078

|        |            |            |            |
|--------|------------|------------|------------|
|        | 0.0615871  | -0.2025399 | -0.6184461 |
| atom C |            |            |            |
|        | v1         | v2         | v3         |
|        | -3.6281939 | -0.5499822 | -0.2625024 |
|        | -0.5851197 | -1.4698827 | -0.5941246 |
|        | -0.1647911 | -1.0284257 | -0.1594806 |
| atom H |            |            |            |
|        | v1         | v2         | v3         |
|        | -0.4237899 | -0.0024380 | 0.0219497  |
|        | 0.0036237  | -0.4683989 | 0.0464931  |
|        | 0.0023292  | 0.1588890  | -0.6760367 |
| atom C |            |            |            |
|        | v1         | v2         | v3         |
|        | -1.7754704 | -0.9150820 | -0.2151053 |
|        | -0.9911041 | 0.6394519  | -0.1175074 |
|        | -0.1251841 | -0.2236992 | 0.0264742  |
| atom O |            |            |            |
|        | v1         | v2         | v3         |
|        | -2.5750770 | -0.3434712 | -0.0586571 |
|        | -0.3070157 | -1.6167587 | -0.0868532 |
|        | -0.0029177 | -0.2494304 | -1.9276638 |
| atom N |            |            |            |
|        | v1         | v2         | v3         |
|        | -2.6576154 | -0.7536020 | -0.6674022 |
|        | -0.6914951 | -1.0665680 | 0.4780825  |
|        | -0.6054464 | 0.5032073  | -0.4553523 |
| atom H |            |            |            |

| v1         | v2         | v3         |
|------------|------------|------------|
| -0.2356406 | -0.0158762 | 0.0071012  |
| -0.0500750 | -0.1635739 | -0.0411815 |
| -0.0294644 | -0.0425573 | -0.2139297 |

atom C

| v1         | v2         | v3         |
|------------|------------|------------|
| -1.8809433 | -0.4041455 | -0.4010490 |
| -0.3915894 | 0.0694848  | -0.4385627 |
| -0.4363576 | -0.5322807 | 0.8032767  |

atom O

| v1         | v2         | v3         |
|------------|------------|------------|
| -2.6809266 | -0.1630570 | -0.1312088 |
| -0.1807169 | -1.9313465 | -0.2266208 |
| -0.0816929 | -0.1867116 | -1.6978637 |

atom H

| v1         | v2         | v3         |
|------------|------------|------------|
| -0.2598922 | -0.0328926 | -0.0092164 |
| 0.0360011  | -0.1941970 | -0.0097028 |
| -0.0259048 | 0.0771380  | -0.2049679 |

val dipeptide

atom N

| v1         | v2         | v3         |
|------------|------------|------------|
| -1.1130550 | 0.2362157  | 0.0392677  |
| 0.1966503  | -1.7722501 | -0.8702194 |
| 0.0976382  | -0.9658576 | -0.6476496 |

atom H

| v1         | v2         | v3         |
|------------|------------|------------|
| -0.0488399 | -0.0470546 | 0.0375299  |
| -0.0587386 | -0.2241103 | -0.0081240 |
| 0.0869643  | -0.0885241 | -0.2567515 |

atom C

| v1         | v2         | v3         |
|------------|------------|------------|
| -0.6105217 | -0.1151229 | -0.1123570 |
| 0.1481781  | -0.7135311 | 0.1236088  |
| 0.0092150  | -0.0128020 | -0.0275549 |

atom H

| v1         | v2         | v3         |
|------------|------------|------------|
| -0.2699115 | 0.0098765  | -0.0160384 |
| -0.0544812 | -0.5759818 | -0.0818651 |
| 0.0914181  | -0.0485491 | -0.5902324 |

atom C

| v1         | v2         | v3         |
|------------|------------|------------|
| -0.1946318 | -0.2816823 | 0.0753950  |
| -0.1055007 | -0.3692553 | -0.1530868 |
| 0.2152396  | 0.0013112  | -0.5531250 |

atom C

| v1         | v2         | v3         |
|------------|------------|------------|
| -0.0438441 | -0.7749514 | -0.3391142 |
| -0.6918519 | -1.4045655 | -0.7832120 |
| -0.4879825 | -0.9521172 | 0.1157890  |

atom H

| v1         | v2        | v3        |
|------------|-----------|-----------|
| -0.5059515 | 0.1940248 | 0.0417943 |



0.1135757 -0.5527803 0.0284588

0.0607998 0.0577898 -0.5024707

atom C

v1 v2 v3

-0.4479407 -0.0574248 -0.0631673

-0.0943978 -0.3450296 -0.2876507

-0.2866259 -0.1518752 -1.0703169

atom C

v1 v2 v3

-0.7866838 -0.2178570 0.1397264

-0.3678557 -0.5960949 0.1866743

0.2857095 0.1778109 -0.5217155

atom O

v1 v2 v3

-2.2029336 0.0330122 -0.1643162

-0.1056019 -2.0794743 -0.2344827

0.2322580 -0.4778911 -1.4114763

atom H

v1 v2 v3

-0.6143187 0.0575265 -0.0715801

0.0164548 -0.3071842 -0.0353985

-0.1320012 0.0077147 -0.5327521

atom H

v1 v2 v3

-0.4201165 0.0123085 -0.0175874

0.0442936 -0.7621580 -0.0900803

-0.0179051 -0.1938387 -0.5322433

atom H

| v1         | v2         | v3         |
|------------|------------|------------|
| -0.5126588 | -0.0618217 | 0.0766479  |
| -0.0426903 | -0.3844192 | -0.0089257 |
| 0.1669105  | 0.0714246  | -0.5976411 |

atom H

| v1         | v2         | v3         |
|------------|------------|------------|
| -0.4731884 | -0.0500743 | 0.0328424  |
| -0.0294124 | -0.4516737 | 0.0332246  |
| -0.0200059 | -0.0032600 | -0.7612877 |

atom H

| v1         | v2         | v3         |
|------------|------------|------------|
| -0.4865317 | -0.0870851 | 0.0184821  |
| -0.0090114 | -0.7856910 | -0.0115684 |
| 0.0533847  | 0.0336943  | -0.4132223 |

atom H

| v1         | v2         | v3         |
|------------|------------|------------|
| -0.7167392 | 0.0060741  | -0.0176153 |
| -0.0996618 | -0.3725579 | 0.0359238  |
| 0.0155201  | 0.0659376  | -0.4326534 |

atom C

| v1        | v2         | v3         |
|-----------|------------|------------|
| 0.2956169 | 0.5991636  | 0.3778067  |
| 0.1481511 | -1.2247668 | -1.0975889 |
| 0.5212854 | -0.9758263 | 0.0452551  |

atom O

| v1 | v2 | v3 |
|----|----|----|
|----|----|----|

|            |            |            |
|------------|------------|------------|
| -2.2874352 | -0.0811509 | 0.1145041  |
| 0.0203360  | -2.0862067 | -0.5099642 |
| -0.2259531 | -0.5074894 | -1.4977572 |

atom C

| v1         | v2         | v3         |
|------------|------------|------------|
| -1.3043423 | -0.4735253 | 0.6521296  |
| -0.4666687 | -1.1702542 | 0.1237520  |
| 0.5295376  | 0.1184684  | -0.8852106 |

atom H

| v1         | v2         | v3         |
|------------|------------|------------|
| -0.5238709 | -0.0553320 | 0.0802464  |
| -0.0289841 | -0.5078278 | 0.1410649  |
| -0.0127778 | 0.1209065  | -0.6148825 |

atom H

| v1         | v2         | v3         |
|------------|------------|------------|
| -0.6469352 | 0.0302777  | 0.0090925  |
| 0.0122831  | -0.5577910 | -0.0033932 |
| 0.0716389  | -0.0212597 | -0.3987901 |

atom H

| v1         | v2         | v3         |
|------------|------------|------------|
| -0.5794185 | -0.0894698 | -0.0297020 |
| -0.1073588 | -0.5187153 | -0.1230576 |
| 0.0199222  | -0.0870996 | -0.5234503 |

atom N

| v1         | v2         | v3         |
|------------|------------|------------|
| -1.1460635 | -0.5735550 | 0.1834506  |
| -0.2237344 | -1.6856985 | -0.9695517 |

```
-0.0794155 -0.6945296 -0.5865133
atom C
      v1      v2      v3
-0.7846476  0.2808048 -0.4730298
  0.3197353 -0.4204358  0.1647032
-0.1472497 -0.0086451 -0.1968057
atom H
      v1      v2      v3
-0.2915498 -0.0084720 -0.0168700
-0.0581320 -0.1934901 -0.0748975
  0.1233999 -0.0640526 -0.2045424
atom H
      v1      v2      v3
-0.5581899  0.0013940 -0.1026894
  0.0234317 -0.5559596 -0.0516299
-0.1621972 -0.0427038 -0.5074020
atom H
      v1      v2      v3
-0.6377312  0.0244750  0.1825682
  0.0557518 -0.4712812 -0.0283552
  0.0920702 -0.0061409 -0.6332093
atom H
      v1      v2      v3
-0.5055583 -0.0092566 -0.0660126
  0.0027386 -0.6880235 -0.0034615
-0.0982969  0.0611458 -0.4233011
```

water

atom O

| v1         | v2         | v3         |
|------------|------------|------------|
| -0.4797294 | -0.0380068 | 0.0000000  |
| -0.0318763 | -0.5245581 | -0.0000001 |
| 0.0000000  | 0.0000000  | -2.3382428 |

atom H

| v1         | v2         | v3         |
|------------|------------|------------|
| -0.1717541 | -0.1223963 | 0.0000000  |
| 0.0350637  | -0.1019390 | 0.0000000  |
| 0.0000000  | 0.0000000  | -0.2503739 |

atom H

| v1         | v2         | v3         |
|------------|------------|------------|
| -0.0885778 | 0.0918824  | 0.0000000  |
| -0.0656961 | -0.1897621 | 0.0000000  |
| 0.0000000  | 0.0000000  | -0.2493776 |
